# Supplementary material for: Genomic correlates of glatiramer acetate adverse cardiovascular effects lead to a novel locus mediating coronary risk
Source: PLoS One. 2017 Aug 22;12(8):e0182999. doi: 10.1371/journal.pone.0182999 (PMC5567477; doi:10.1371/journal.pone.0182999)
Supplement: S2 Table — Functional implication of the SNPs annotated with HaploReg version 4.1 database. (XLSX) [file pone.0182999.s004.xlsx]

## Sheet: Sheet1
Haploreg v4 Results
chr	pos_hg38	r2	D'	is_query_snp	rsID	ref	alt	AFR	AMR	ASN	EUR	GERP_cons	SiPhy_cons	Chromatin_States	Chromatin_States_Imputed	Chromatin_Marks	DNAse	Proteins	eQTL	gwas	grasp	Motifs	GENCODE_id	GENCODE_name	GENCODE_direction	GENCODE_distance	RefSeq_id	RefSeq_name	RefSeq_direction	RefSeq_distance	dbSNP_functional_annotation	query_snp_rsid
19	41250598	0.8	0.91	0	rs12977563	A	G	0.1	0.16	0.27	0.17	0	0	E056,3_TxFlnk		E006,H3K4me1_Enh;E022,H3K4me1_Enh;E055,H3K4me1_Enh;E056,H3K4me1_Enh;E058,H3K4me1_Enh;E017,H3K27ac_Enh;E049,H3K27ac_Enh;E055,H3K27ac_Enh;E056,H3K27ac_Enh;E105,H3K27ac_Enh;E111,H3K27ac_Enh;E129,H3K27ac_Enh;E023,H3K9ac_Pro;E049,H3K9ac_Pro;E111,H3K9ac_Pro;E055,H3K4me3_Pro;E056,H3K4me3_Pro;E096,H3K4me3_Pro		.	Lappalainen2013,Lymphoblastoid_EUR_exonlevel,ENSG00000105323.10_41809877_41810166,2.29748661107903e-06	.	.	CACD_2;ELF1_disc3;Egr-1_disc6;Ets_disc7;Klf4;Klf7;NRSF_disc9;SP1_known4;YY1_disc4;Zfp161_2	ENSG00000167601.6	AXL	0	0	NM_001699	AXL	0	0	INT	rs1056854
19	41251539	0.8	0.91	0	rs11879429	G	A	0.1	0.15	0.27	0.17	0	0			E007,H3K4me3_Pro;E059,H3K4me3_Pro;E096,H3K4me3_Pro;E017,H3K27ac_Enh;E026,H3K27ac_Enh;E049,H3K27ac_Enh;E056,H3K27ac_Enh;E111,H3K27ac_Enh;E128,H3K27ac_Enh;E129,H3K27ac_Enh;E017,H3K9ac_Pro;E023,H3K9ac_Pro;E049,H3K9ac_Pro;E089,H3K4me1_Enh		.	Lappalainen2013,Lymphoblastoid_EUR_exonlevel,ENSG00000105323.10_41809877_41810166,1.96065474505412e-06	.	.	AP-2_known1;AP-2_known7;AhR_1;HNF4_known1;Pax-4_1;VDR_2	ENSG00000167601.6	AXL	0	0	NM_001699	AXL	0	0	INT	rs1056854
19	41251698	0.8	0.91	0	rs11879435	C	T	0.1	0.15	0.27	0.17	0	0			E006,H3K4me1_Enh;E089,H3K4me1_Enh;E017,H3K9ac_Pro;E023,H3K9ac_Pro;E049,H3K9ac_Pro;E026,H3K27ac_Enh;E049,H3K27ac_Enh;E056,H3K27ac_Enh;E111,H3K27ac_Enh;E128,H3K27ac_Enh;E129,H3K27ac_Enh;E059,H3K4me3_Pro;E096,H3K4me3_Pro	E114	.	Lappalainen2013,Lymphoblastoid_EUR_exonlevel,ENSG00000105323.10_41809877_41810166,2.17376591943016e-06	.	.	ERalpha-a_disc4;RXRA_known6;TCF11::MafG;YY1_disc1	ENSG00000167601.6	AXL	0	0	NM_001699	AXL	0	0	INT	rs1056854
19	41256620	0.83	0.92	0	rs2304232	A	G	0.1	0.16	0.27	0.16	0	0	E006,6_EnhG;E055,6_EnhG;E056,6_EnhG	E007,11_TxEnh3;E055,10_TxEnh5	E005,H3K4me3_Pro;E007,H3K4me3_Pro;E055,H3K4me3_Pro;E056,H3K4me3_Pro;E074,H3K4me3_Pro;E096,H3K4me3_Pro;E113,H3K4me3_Pro;E006,H3K9ac_Pro;E007,H3K9ac_Pro;E049,H3K9ac_Pro;E063,H3K9ac_Pro;E073,H3K9ac_Pro;E124,H3K9ac_Pro;E049,H3K27ac_Enh;E055,H3K27ac_Enh;E056,H3K27ac_Enh;E061,H3K27ac_Enh;E076,H3K27ac_Enh;E096,H3K27ac_Enh;E105,H3K27ac_Enh;E112,H3K27ac_Enh;E128,H3K27ac_Enh;E055,H3K4me1_Enh;E056,H3K4me1_E…	E097	.	Lappalainen2013,Lymphoblastoid_EUR_exonlevel,ENSG00000105323.10_41809877_41810166,3.02729603981493e-06;Westra2013,Whole_Blood,CCDC97,0.0034401372076349507;Westra2013,Whole_Blood,HNRNPUL1,3.1920170143478394E-12	.	19222302,Gene expression of HNRPUL1 [probe 3834089] in peripheral blood mononuclear cells,5.57E-05;20502693,Gene expression of AXL in peripheral blood monocytes,5.10E-08;21829388,Gene expression of HNRNPUL1 in blood,2.4E-04	E2F_disc3;Mtf1_1;Pax-5_disc5;TCF12_disc3;YY1_disc5	ENSG00000167601.6	AXL	0	0	NM_001699	AXL	0	0	INT	rs1056854
19	41256765	0.83	0.92	0	rs2304231	T	C	0.14	0.16	0.27	0.16	0	0			E005,H3K4me3_Pro;E007,H3K4me3_Pro;E055,H3K4me3_Pro;E056,H3K4me3_Pro;E096,H3K4me3_Pro;E113,H3K4me3_Pro;E006,H3K9ac_Pro;E007,H3K9ac_Pro;E049,H3K9ac_Pro;E063,H3K9ac_Pro;E073,H3K9ac_Pro;E124,H3K9ac_Pro;E055,H3K27ac_Enh;E056,H3K27ac_Enh;E061,H3K27ac_Enh;E076,H3K27ac_Enh;E096,H3K27ac_Enh;E105,H3K27ac_Enh;E112,H3K27ac_Enh;E128,H3K27ac_Enh;E055,H3K4me1_Enh;E056,H3K4me1_Enh;E096,H3K4me1_Enh	E091	.	Lappalainen2013,Lymphoblastoid_EUR_exonlevel,ENSG00000105323.10_41809877_41810166,3.02572132416013e-06;Westra2013,Whole_Blood,CCDC97,0.0034401372076349507;Westra2013,Whole_Blood,HNRNPUL1,3.1920170143478394E-12	.	.	SP1_known4	ENSG00000167601.6	AXL	0	0	NM_001699	AXL	0	0	INT	rs1056854
19	41256794	0.83	0.92	0	rs3214621	TA	T	0.14	0.17	0.27	0.16	0	0			E005,H3K4me3_Pro;E007,H3K4me3_Pro;E055,H3K4me3_Pro;E056,H3K4me3_Pro;E096,H3K4me3_Pro;E113,H3K4me3_Pro;E006,H3K9ac_Pro;E007,H3K9ac_Pro;E063,H3K9ac_Pro;E073,H3K9ac_Pro;E124,H3K9ac_Pro;E055,H3K27ac_Enh;E056,H3K27ac_Enh;E061,H3K27ac_Enh;E076,H3K27ac_Enh;E096,H3K27ac_Enh;E105,H3K27ac_Enh;E112,H3K27ac_Enh;E128,H3K27ac_Enh;E055,H3K4me1_Enh;E056,H3K4me1_Enh;E096,H3K4me1_Enh	E091	.	Lappalainen2013,Lymphoblastoid_EUR_exonlevel,ENSG00000105323.10_41809877_41810166,3.964550871375e-06	.	.	Foxp3;Myc_disc9;Myc_known3;NF-E2_disc3;TATA_known3;p300_disc7	ENSG00000167601.6	AXL	0	0	NM_001699	AXL	0	0	INT	rs1056854
19	41258378	0.83	0.92	0	rs35570314	AT	A	0.1	0.16	0.27	0.16	0	0			E006,H3K27ac_Enh;E049,H3K27ac_Enh;E055,H3K27ac_Enh;E056,H3K27ac_Enh;E059,H3K27ac_Enh;E061,H3K27ac_Enh;E096,H3K27ac_Enh;E128,H3K27ac_Enh;E129,H3K27ac_Enh;E023,H3K9ac_Pro;E049,H3K9ac_Pro;E063,H3K9ac_Pro;E101,H3K9ac_Pro;E125,H3K9ac_Pro;E055,H3K4me1_Enh;E096,H3K4me1_Enh;E055,H3K4me3_Pro;E056,H3K4me3_Pro;E070,H3K4me3_Pro		.	Lappalainen2013,Lymphoblastoid_EUR_exonlevel,ENSG00000105323.10_41809877_41810166,2.73577867096475e-06	.	.	Evi-1_3;GATA_disc1;GATA_known10;GATA_known2;GATA_known4;GATA_known9;HDAC2_disc1;Pou1f1_2	ENSG00000167601.6	AXL	0	0	NM_001699	AXL	0	0	INT	rs1056854
19	41259502	0.83	0.92	0	rs4591267	A	C	0.1	0.16	0.27	0.16	0	0	E056,6_EnhG		E006,H3K27ac_Enh;E043,H3K27ac_Enh;E049,H3K27ac_Enh;E055,H3K27ac_Enh;E056,H3K27ac_Enh;E059,H3K27ac_Enh;E061,H3K27ac_Enh;E062,H3K27ac_Enh;E063,H3K27ac_Enh;E068,H3K27ac_Enh;E069,H3K27ac_Enh;E072,H3K27ac_Enh;E089,H3K27ac_Enh;E096,H3K27ac_Enh;E128,H3K27ac_Enh;E129,H3K27ac_Enh;E008,H3K9ac_Pro;E023,H3K9ac_Pro;E025,H3K9ac_Pro;E038,H3K9ac_Pro;E049,H3K9ac_Pro;E052,H3K9ac_Pro;E063,H3K9ac_Pro;E101,H3K9ac_Pro…	E034	.	Lappalainen2013,Lymphoblastoid_EUR_exonlevel,ENSG00000105323.10_41809877_41810166,3.02729603981493e-06;Westra2013,Whole_Blood,CCDC97,0.0034401372076349507;Westra2013,Whole_Blood,HNRNPUL1,3.1920170143478394E-12	.	.	SETDB1_disc1	ENSG00000167601.6	AXL	0	0	NM_001699	AXL	0	0	INT	rs1056854
19	41261880	0.83	0.92	0	rs1946613	C	T	0.1	0.16	0.27	0.16	0	1	E001,1_TssA;E003,7_Enh;E006,6_EnhG;E009,2_TssAFlnk;E010,2_TssAFlnk;E013,3_TxFlnk;E015,3_TxFlnk;E016,1_TssA;E017,6_EnhG;E019,1_TssA;E022,7_Enh;E023,3_TxFlnk;E025,3_TxFlnk;E026,3_TxFlnk;E028,2_TssAFlnk;E029,12_EnhBiv;E030,12_EnhBiv;E032,7_Enh;E034,7_Enh;E035,7_Enh;E036,7_Enh;E037,7_Enh;E038,7_Enh;E039,7_Enh;E040,7_Enh;E041,2_TssAFlnk;E042,2_TssAFlnk;E043,7_Enh;E044,7_Enh;E045,7_Enh;E046,7_Enh;E047,…	E001,4_PromD2;E002,22_PromP;E003,22_PromP;E004,16_EnhW1;E005,13_EnhA1;E006,13_EnhA1;E007,16_EnhW1;E008,22_PromP;E009,2_PromU;E010,2_PromU;E011,22_PromP;E012,16_EnhW1;E013,3_PromD1;E014,22_PromP;E015,22_PromP;E016,22_PromP;E017,9_TxReg;E018,16_EnhW1;E019,22_PromP;E020,16_EnhW1;E022,14_EnhA2;E023,9_TxReg;E024,17_EnhW2;E025,9_TxReg;E026,3_PromD1;E027,13_EnhA1;E028,3_PromD1;E029,2_PromU;E030,2_PromU;…	E001,H3K4me3_Pro;E003,H3K4me3_Pro;E006,H3K4me3_Pro;E007,H3K4me3_Pro;E008,H3K4me3_Pro;E009,H3K4me3_Pro;E010,H3K4me3_Pro;E012,H3K4me3_Pro;E013,H3K4me3_Pro;E014,H3K4me3_Pro;E015,H3K4me3_Pro;E016,H3K4me3_Pro;E017,H3K4me3_Pro;E018,H3K4me3_Pro;E019,H3K4me3_Pro;E020,H3K4me3_Pro;E021,H3K4me3_Pro;E022,H3K4me3_Pro;E023,H3K4me3_Pro;E025,H3K4me3_Pro;E026,H3K4me3_Pro;E027,H3K4me3_Pro;E028,H3K4me3_Pro;E032,H3K…	E007;E032;E033;E034;E057;E082;E083;E090;E091;E097;E098;E100;E114	.	Lappalainen2013,Lymphoblastoid_EUR_exonlevel,ENSG00000105323.10_41809877_41810166,2.91204293022901e-06;Westra2013,Whole_Blood,CCDC97,0.0033462420840266443;Westra2013,Whole_Blood,HNRNPUL1,3.3979000427809677E-12	.	.	GR_known9;THAP1_disc1	ENSG00000167601.6	AXL	3	114	NM_001699	AXL	3	113	.	rs1056854
19	41263120	0.83	0.92	0	rs3760660	A	T	0.1	0.16	0.27	0.16	0	0	E001,1_TssA;E002,1_TssA;E003,1_TssA;E004,1_TssA;E005,1_TssA;E006,1_TssA;E007,1_TssA;E008,1_TssA;E009,1_TssA;E010,1_TssA;E011,1_TssA;E012,1_TssA;E013,1_TssA;E014,1_TssA;E015,1_TssA;E016,1_TssA;E017,1_TssA;E018,1_TssA;E019,1_TssA;E020,1_TssA;E021,1_TssA;E022,1_TssA;E023,1_TssA;E024,1_TssA;E025,1_TssA;E026,1_TssA;E027,1_TssA;E028,1_TssA;E029,1_TssA;E030,2_TssAFlnk;E031,1_TssA;E032,1_TssA;E033,1_TssA…	E001,3_PromD1;E002,1_TssA;E003,3_PromD1;E004,3_PromD1;E005,1_TssA;E006,3_PromD1;E007,3_PromD1;E008,3_PromD1;E009,1_TssA;E010,1_TssA;E011,3_PromD1;E012,3_PromD1;E013,3_PromD1;E014,3_PromD1;E015,3_PromD1;E016,3_PromD1;E017,3_PromD1;E018,3_PromD1;E019,3_PromD1;E020,3_PromD1;E021,3_PromD1;E022,3_PromD1;E023,3_PromD1;E024,3_PromD1;E025,3_PromD1;E026,3_PromD1;E027,3_PromD1;E028,2_PromU;E029,3_PromD1;E0…	E001,H3K4me3_Pro;E002,H3K4me3_Pro;E003,H3K4me3_Pro;E004,H3K4me3_Pro;E005,H3K4me3_Pro;E006,H3K4me3_Pro;E007,H3K4me3_Pro;E008,H3K4me3_Pro;E009,H3K4me3_Pro;E010,H3K4me3_Pro;E011,H3K4me3_Pro;E012,H3K4me3_Pro;E013,H3K4me3_Pro;E014,H3K4me3_Pro;E015,H3K4me3_Pro;E016,H3K4me3_Pro;E017,H3K4me3_Pro;E018,H3K4me3_Pro;E019,H3K4me3_Pro;E020,H3K4me3_Pro;E021,H3K4me3_Pro;E022,H3K4me3_Pro;E023,H3K4me3_Pro;E024,H3K…	E003;E004;E005;E006;E007;E008;E017;E021;E028;E029;E032;E033;E034;E046;E050;E051;E055;E056;E057;E059;E080;E081;E082;E083;E084;E085;E086;E088;E089;E090;E091;E092;E093;E094;E097;E098;E100;E109;E114;E116;E117;E118;E119;E120;E121;E122;E123;E124;E125;E126;E127;E128	A549,POL2,HudsonAlpha,EtOH_0.02pct;GM12878,BATF,HudsonAlpha,None;GM12878,BCL11A,HudsonAlpha,None;GM12878,EGR1,HudsonAlpha,None;GM12878,MEF2A,HudsonAlpha,None;GM12878,OCT2,HudsonAlpha,None;GM12878,P300,HudsonAlpha,None;GM12878,PAX5C20,HudsonAlpha,None;GM12878,PAX5N19,HudsonAlpha,None;GM12878,POU2F2,HudsonAlpha,None;GM12878,TCF12,HudsonAlpha,None;GM12891,OCT2,HudsonAlpha,None;GM12891,POU2F2,HudsonA…	Lappalainen2013,Lymphoblastoid_EUR_exonlevel,ENSG00000105323.10_41809877_41810166,3.02729603981493e-06;Westra2013,Whole_Blood,CCDC97,0.003256789521862558;Westra2013,Whole_Blood,HNRNPUL1,3.611662541598091E-12	.	.	Foxc1_1;Foxf2;Foxj1_2;Foxj2_1;Foxk1;Foxo_2;Hoxc10	ENSG00000105323.11	HNRNPUL1	0	0	NM_144732	HNRNPUL1	0	0	INT	rs1056854
19	41267892	0.95	0.99	0	rs3816052	G	A	0.34	0.22	0.33	0.17	0	0	E006,7_Enh;E011,6_EnhG;E013,6_EnhG;E017,6_EnhG;E023,7_Enh;E025,7_Enh;E026,7_Enh;E027,6_EnhG;E031,6_EnhG;E032,6_EnhG;E033,6_EnhG;E034,6_EnhG;E037,7_Enh;E038,6_EnhG;E039,6_EnhG;E040,7_Enh;E041,3_TxFlnk;E042,6_EnhG;E043,6_EnhG;E045,7_Enh;E046,6_EnhG;E047,6_EnhG;E048,7_Enh;E049,6_EnhG;E050,6_EnhG;E052,6_EnhG;E053,6_EnhG;E054,6_EnhG;E055,3_TxFlnk;E058,6_EnhG;E059,6_EnhG;E061,2_TssAFlnk;E062,6_EnhG;E06…	E006,12_TxEnhW;E011,10_TxEnh5;E013,10_TxEnh5;E017,10_TxEnh5;E018,10_TxEnh5;E023,9_TxReg;E025,9_TxReg;E026,9_TxReg;E027,10_TxEnh5;E028,10_TxEnh5;E032,10_TxEnh5;E034,10_TxEnh5;E037,10_TxEnh5;E038,10_TxEnh5;E039,9_TxReg;E040,10_TxEnh5;E041,9_TxReg;E042,10_TxEnh5;E043,10_TxEnh5;E044,10_TxEnh5;E045,10_TxEnh5;E046,10_TxEnh5;E047,10_TxEnh5;E048,10_TxEnh5;E049,9_TxReg;E050,9_TxReg;E051,10_TxEnh5;E052,10_…	E003,H3K27ac_Enh;E004,H3K27ac_Enh;E005,H3K27ac_Enh;E006,H3K27ac_Enh;E008,H3K27ac_Enh;E012,H3K27ac_Enh;E013,H3K27ac_Enh;E014,H3K27ac_Enh;E015,H3K27ac_Enh;E016,H3K27ac_Enh;E017,H3K27ac_Enh;E019,H3K27ac_Enh;E020,H3K27ac_Enh;E026,H3K27ac_Enh;E032,H3K27ac_Enh;E034,H3K27ac_Enh;E037,H3K27ac_Enh;E038,H3K27ac_Enh;E039,H3K27ac_Enh;E040,H3K27ac_Enh;E041,H3K27ac_Enh;E042,H3K27ac_Enh;E043,H3K27ac_Enh;E044,H3K…	E034;E057;E114;E116;E127	.	GTEx2015_v6,Adrenal_Gland,TGFB1,5.72033548964299e-10;GTEx2015_v6,Artery_Tibial,AXL,1.23049134601369e-08;Lappalainen2013,Lymphoblastoid_EUR_exonlevel,ENSG00000105323.10_41809877_41810166,2.6979187407582e-07;Westra2013,Whole_Blood,BCKDHA,0.002455271668329432;Westra2013,Whole_Blood,CCDC97,0.0011220040634199637;Westra2013,Whole_Blood,HNRNPUL1,2.0894532936201405E-14	.	20502693,Gene expression of AXL in peripheral blood monocytes,3.34E-06	Hoxb6	ENSG00000105323.11	HNRNPUL1	0	0	NM_007040	HNRNPUL1	0	0	INT	rs1056854
19	41268159	0.95	0.99	0	rs2304230	T	C	0.29	0.22	0.33	0.17	0	0	E025,6_EnhG;E034,6_EnhG;E037,6_EnhG;E039,6_EnhG;E040,6_EnhG;E041,6_EnhG;E043,6_EnhG;E047,6_EnhG;E048,6_EnhG;E061,6_EnhG;E070,6_EnhG;E076,6_EnhG;E090,6_EnhG;E110,7_Enh;E111,6_EnhG;E115,6_EnhG;E117,6_EnhG;E129,6_EnhG	E025,10_TxEnh5;E037,10_TxEnh5;E039,10_TxEnh5;E040,10_TxEnh5;E041,10_TxEnh5;E042,10_TxEnh5;E043,10_TxEnh5;E055,10_TxEnh5;E061,10_TxEnh5;E115,10_TxEnh5	E003,H3K27ac_Enh;E004,H3K27ac_Enh;E006,H3K27ac_Enh;E012,H3K27ac_Enh;E013,H3K27ac_Enh;E014,H3K27ac_Enh;E015,H3K27ac_Enh;E016,H3K27ac_Enh;E017,H3K27ac_Enh;E019,H3K27ac_Enh;E020,H3K27ac_Enh;E032,H3K27ac_Enh;E034,H3K27ac_Enh;E037,H3K27ac_Enh;E039,H3K27ac_Enh;E040,H3K27ac_Enh;E041,H3K27ac_Enh;E042,H3K27ac_Enh;E043,H3K27ac_Enh;E044,H3K27ac_Enh;E045,H3K27ac_Enh;E046,H3K27ac_Enh;E047,H3K27ac_Enh;E048,H3K…		.	GTEx2015_v6,Adrenal_Gland,TGFB1,4.21070776875528e-09;GTEx2015_v6,Artery_Tibial,AXL,3.76289795372695e-09;GTEx2015_v6,Lung,AXL,4.33084418281378e-06;Lappalainen2013,Lymphoblastoid_EUR_exonlevel,ENSG00000105323.10_41809877_41810166,2.70590119419938e-07;Westra2013,Whole_Blood,BCKDHA,0.002757071417729365;Westra2013,Whole_Blood,CCDC97,9.177434707292581E-4;Westra2013,Whole_Blood,HNRNPUL1,1.20414405365457…	.	19222302,Gene expression of HNRPUL1 [probe 3834089] in peripheral blood mononuclear cells,5.52E-04;21829388,Gene expression of HNRNPUL1 in blood,3.1E-05	SETDB1_disc1	ENSG00000105323.11	HNRNPUL1	0	0	NM_007040	HNRNPUL1	0	0	INT	rs1056854
19	41268586	0.95	0.99	0	rs10410836	T	C	0.34	0.22	0.33	0.17	0	0			E006,H3K4me1_Enh;E013,H3K4me1_Enh;E027,H3K4me1_Enh;E028,H3K4me1_Enh;E034,H3K4me1_Enh;E037,H3K4me1_Enh;E039,H3K4me1_Enh;E040,H3K4me1_Enh;E041,H3K4me1_Enh;E043,H3K4me1_Enh;E044,H3K4me1_Enh;E045,H3K4me1_Enh;E047,H3K4me1_Enh;E048,H3K4me1_Enh;E050,H3K4me1_Enh;E054,H3K4me1_Enh;E055,H3K4me1_Enh;E056,H3K4me1_Enh;E061,H3K4me1_Enh;E070,H3K4me1_Enh;E078,H3K4me1_Enh;E088,H3K4me1_Enh;E089,H3K4me1_Enh;E101,H3K…	E097	.	GTEx2015_v6,Adrenal_Gland,TGFB1,6.46107075391504e-10;GTEx2015_v6,Artery_Tibial,AXL,7.52205281891878e-09;GTEx2015_v6,Lung,AXL,1.10107725361429e-05;Lappalainen2013,Lymphoblastoid_EUR_exonlevel,ENSG00000105323.10_41809877_41810166,2.5099194859179e-07	.	.	CACD_1;CACD_2;HEY1_disc2;NRSF_disc5;Sin3Ak-20_disc5;YY1_disc4	ENSG00000105323.11	HNRNPUL1	0	0	NM_007040	HNRNPUL1	0	0	INT	rs1056854
19	41269030	0.86	0.99	0	rs12972949	G	T	0.05	0.12	0.27	0.15	0	0	E047,6_EnhG;E048,6_EnhG		E006,H3K9ac_Pro;E008,H3K9ac_Pro;E016,H3K9ac_Pro;E019,H3K9ac_Pro;E023,H3K9ac_Pro;E025,H3K9ac_Pro;E062,H3K9ac_Pro;E063,H3K9ac_Pro;E068,H3K9ac_Pro;E075,H3K9ac_Pro;E076,H3K9ac_Pro;E083,H3K9ac_Pro;E088,H3K9ac_Pro;E107,H3K9ac_Pro;E110,H3K9ac_Pro;E115,H3K9ac_Pro;E012,H3K27ac_Enh;E013,H3K27ac_Enh;E015,H3K27ac_Enh;E020,H3K27ac_Enh;E032,H3K27ac_Enh;E034,H3K27ac_Enh;E037,H3K27ac_Enh;E039,H3K27ac_Enh;E040,H3…		.	GTEx2015_v6,Adrenal_Gland,TGFB1,1.24365458568687e-06;GTEx2015_v6,Artery_Tibial,AXL,1.56443877279317e-05;Lappalainen2013,Lymphoblastoid_EUR_exonlevel,ENSG00000105323.10_41809877_41810166,4.17512832672469e-06	.	.	NF-kappaB_known3;NF-kappaB_known6;STAT_known14	ENSG00000105323.11	HNRNPUL1	0	0	NM_007040	HNRNPUL1	0	0	INT	rs1056854
19	41270352	0.95	0.99	0	rs66724427	A	G	0.29	0.22	0.33	0.17	0	0	E029,6_EnhG		E006,H3K9ac_Pro;E049,H3K9ac_Pro;E013,H3K27ac_Enh;E029,H3K27ac_Enh;E040,H3K27ac_Enh;E041,H3K27ac_Enh;E042,H3K27ac_Enh;E043,H3K27ac_Enh;E049,H3K27ac_Enh;E050,H3K27ac_Enh;E055,H3K27ac_Enh;E056,H3K27ac_Enh;E061,H3K27ac_Enh;E080,H3K27ac_Enh;E124,H3K27ac_Enh;E129,H3K27ac_Enh;E029,H3K4me1_Enh;E034,H3K4me1_Enh;E041,H3K4me1_Enh;E043,H3K4me1_Enh;E044,H3K4me1_Enh;E047,H3K4me1_Enh;E080,H3K4me1_Enh;E089,H3K4m…	E098;E116	.	GTEx2015_v6,Adrenal_Gland,TGFB1,4.21070776875528e-09;GTEx2015_v6,Artery_Tibial,AXL,3.76289795372695e-09;GTEx2015_v6,Lung,AXL,4.33084418281378e-06;Lappalainen2013,Lymphoblastoid_EUR_exonlevel,ENSG00000105323.10_41809877_41810166,2.6119492881034e-07	.	.	ATF3_known8;Bach1;GR_disc4;TATA_disc1;THAP1_disc1;YY1_disc1;YY1_known5	ENSG00000105323.11	HNRNPUL1	0	0	NM_007040	HNRNPUL1	0	0	INT	rs1056854
19	41275588	0.97	0.99	0	rs8103839	C	G	0.06	0.15	0.27	0.16	0	0	E030,6_EnhG		E004,H3K27ac_Enh;E012,H3K27ac_Enh;E039,H3K27ac_Enh;E040,H3K27ac_Enh;E042,H3K27ac_Enh;E043,H3K27ac_Enh;E049,H3K27ac_Enh;E050,H3K27ac_Enh;E055,H3K27ac_Enh;E061,H3K27ac_Enh;E105,H3K27ac_Enh;E124,H3K27ac_Enh;E129,H3K27ac_Enh;E018,H3K9ac_Pro;E023,H3K9ac_Pro;E025,H3K9ac_Pro;E049,H3K9ac_Pro;E087,H3K9ac_Pro;E030,H3K4me1_Enh;E056,H3K4me1_Enh;E055,H3K4me3_Pro;E056,H3K4me3_Pro;E113,H3K4me3_Pro		.	GTEx2015_v6,Adrenal_Gland,TGFB1,1.32087025976433e-07;GTEx2015_v6,Artery_Tibial,AXL,7.68984578684155e-06;Lappalainen2013,Lymphoblastoid_EUR_exonlevel,ENSG00000105323.10_41809877_41810166,1.83233932345044e-07;Westra2013,Whole_Blood,BCKDHA,0.002346997852873052;Westra2013,Whole_Blood,CCDC97,0.0011196340893792076;Westra2013,Whole_Blood,HNRNPUL1,1.8797084844079797E-14	.	20502693,Gene expression of AXL in peripheral blood monocytes,1.36E-06	.	ENSG00000105323.11	HNRNPUL1	0	0	NM_007040	HNRNPUL1	0	0	INT	rs1056854
19	41279377	0.95	0.99	0	rs3745295	T	G	0.27	0.22	0.33	0.17	0	0			E006,H3K27ac_Enh;E012,H3K27ac_Enh;E039,H3K27ac_Enh;E041,H3K27ac_Enh;E043,H3K27ac_Enh;E050,H3K27ac_Enh;E055,H3K27ac_Enh;E061,H3K27ac_Enh;E087,H3K27ac_Enh;E124,H3K27ac_Enh;E125,H3K27ac_Enh;E129,H3K27ac_Enh;E007,H3K9ac_Pro;E014,H3K9ac_Pro;E049,H3K9ac_Pro;E055,H3K4me3_Pro		.	GTEx2015_v6,Adrenal_Gland,TGFB1,4.21070776875528e-09;GTEx2015_v6,Artery_Tibial,AXL,3.76289795372695e-09;GTEx2015_v6,Lung,AXL,4.33084418281378e-06;Lappalainen2013,Lymphoblastoid_EUR_exonlevel,ENSG00000105323.10_41809877_41810166,2.6294517625557e-07;Westra2013,Whole_Blood,BCKDHA,0.0022446092606424046;Westra2013,Whole_Blood,CCDC97,0.0010716791043422701;Westra2013,Whole_Blood,HNRNPUL1,1.8797084844079…	.	19222302,Gene expression of HNRPUL1 [probe 3834089] in peripheral blood mononuclear cells,5.52E-04;21829388,Gene expression of HNRNPUL1 in blood,3.1E-05	Foxp3;GR_known10;Myf_4;STAT_known15;TAL1_known2	ENSG00000105323.11	HNRNPUL1	0	0	NM_007040	HNRNPUL1	0	0	INT	rs1056854
19	41282026	0.95	0.99	0	rs7256416	C	T	0.29	0.21	0.33	0.17	0	0	E087,7_Enh		E018,H3K9ac_Pro;E049,H3K9ac_Pro;E087,H3K9ac_Pro;E039,H3K27ac_Enh;E043,H3K27ac_Enh;E050,H3K27ac_Enh;E087,H3K27ac_Enh;E124,H3K27ac_Enh;E087,H3K4me1_Enh		.	GTEx2015_v6,Adrenal_Gland,TGFB1,4.21070776875528e-09;GTEx2015_v6,Artery_Tibial,AXL,3.86017029809695e-09;GTEx2015_v6,Lung,AXL,4.45523868605942e-06;Lappalainen2013,Lymphoblastoid_EUR_exonlevel,ENSG00000105323.10_41809877_41810166,2.6789407089353e-07	.	.	Barhl1;Dobox4;Foxj2_2;HMG-IY_2;Isl2;Nkx2_11;Nkx2_3;Nkx3_3	ENSG00000105323.11	HNRNPUL1	0	0	NM_007040	HNRNPUL1	0	0	INT	rs1056854
19	41282212	0.95	0.99	0	rs7257583	T	C	0.34	0.22	0.33	0.17	0	0			E039,H3K27ac_Enh;E043,H3K27ac_Enh;E050,H3K27ac_Enh;E049,H3K9ac_Pro		.	GTEx2015_v6,Adrenal_Gland,TGFB1,6.43197062736657e-10;GTEx2015_v6,Artery_Tibial,AXL,7.74039489932061e-09;Lappalainen2013,Lymphoblastoid_EUR_exonlevel,ENSG00000105323.10_41809877_41810166,2.84157104470033e-07	.	.	CIZ	ENSG00000105323.11	HNRNPUL1	0	0	NM_007040	HNRNPUL1	0	0	INT	rs1056854
19	41282439	0.95	0.99	0	rs7257825	T	C	0.28	0.21	0.33	0.17	0	0			E039,H3K27ac_Enh;E050,H3K27ac_Enh;E049,H3K9ac_Pro		.	GTEx2015_v6,Adrenal_Gland,TGFB1,4.21070776875528e-09;GTEx2015_v6,Artery_Tibial,AXL,3.85411101721254e-09;GTEx2015_v6,Lung,AXL,4.5294810934602e-06;Lappalainen2013,Lymphoblastoid_EUR_exonlevel,ENSG00000105323.10_41809877_41810166,3.42526049878055e-07	.	.	LRH1;Zfx	ENSG00000105323.11	HNRNPUL1	0	0	NM_007040	HNRNPUL1	0	0	INT	rs1056854
19	41282447	0.95	0.99	0	rs7256856	A	G	0.28	0.21	0.33	0.17	0	0			E039,H3K27ac_Enh;E050,H3K27ac_Enh;E049,H3K9ac_Pro		.	GTEx2015_v6,Adrenal_Gland,TGFB1,4.21070776875528e-09;GTEx2015_v6,Artery_Tibial,AXL,3.84529339714887e-09;GTEx2015_v6,Lung,AXL,4.50491862926676e-06;Lappalainen2013,Lymphoblastoid_EUR_exonlevel,ENSG00000105323.10_41809877_41810166,3.59785704430338e-07	.	.	NRSF_disc10	ENSG00000105323.11	HNRNPUL1	0	0	NM_007040	HNRNPUL1	0	0	INT	rs1056854
19	41283273	0.97	0.99	0	rs35812313	T	C	0.06	0.15	0.27	0.16	0	0			E039,H3K27ac_Enh;E124,H3K27ac_Enh		.	GTEx2015_v6,Adrenal_Gland,TGFB1,1.32087025976433e-07;GTEx2015_v6,Artery_Tibial,AXL,7.96478508883457e-06;Lappalainen2013,Lymphoblastoid_EUR_exonlevel,ENSG00000105323.10_41809877_41810166,1.47727175422654e-07	.	.	Evi-1_4;Gfi1b;Myf_4	ENSG00000105323.11	HNRNPUL1	0	0	NM_007040	HNRNPUL1	0	0	INT	rs1056854
19	41283653	0.97	0.99	0	rs67744888	G	A	0.06	0.15	0.27	0.16	0	0			E007,H3K27ac_Enh;E039,H3K27ac_Enh;E041,H3K27ac_Enh;E076,H3K27ac_Enh;E124,H3K27ac_Enh;E034,H3K4me1_Enh;E109,H3K4me3_Pro		.	GTEx2015_v6,Adrenal_Gland,TGFB1,1.31962472375431e-07;GTEx2015_v6,Artery_Tibial,AXL,8.00143435473668e-06;Lappalainen2013,Lymphoblastoid_EUR_exonlevel,ENSG00000105323.10_41809877_41810166,1.76881585808182e-07	.	.	.	ENSG00000105323.11	HNRNPUL1	0	0	NM_007040	HNRNPUL1	0	0	INT	rs1056854
19	41286186	0.95	0.98	0	rs199525945	T	TA	0.06	0.15	0.26	0.16	0	0			E012,H3K27ac_Enh;E013,H3K27ac_Enh;E020,H3K27ac_Enh;E041,H3K27ac_Enh;E045,H3K27ac_Enh;E049,H3K27ac_Enh;E050,H3K27ac_Enh;E061,H3K27ac_Enh;E076,H3K27ac_Enh;E111,H3K27ac_Enh;E124,H3K27ac_Enh;E034,H3K4me1_Enh;E039,H3K4me1_Enh;E044,H3K4me1_Enh;E099,H3K4me3_Pro		.	GTEx2015_v6,Adrenal_Gland,TGFB1,5.00160417934335e-07;GTEx2015_v6,Artery_Tibial,AXL,1.30300984960697e-05;Lappalainen2013,Lymphoblastoid_EUR_exonlevel,ENSG00000105323.10_41809877_41810166,2.40389146649857e-07	.	.	AP-1_disc4;Foxa_known2;Foxa_known4;Foxp1;GATA_known8;HDAC2_disc6;Ik-2_3;Irf_disc3;TATA_disc7;Zfp105;p300_disc5	ENSG00000105323.11	HNRNPUL1	0	0	NM_007040	HNRNPUL1	0	0	INT	rs1056854
19	41286187	0.95	0.98	0	rs8105901	T	A	0.06	0.15	0.27	0.16	0	0			E012,H3K27ac_Enh;E013,H3K27ac_Enh;E020,H3K27ac_Enh;E041,H3K27ac_Enh;E045,H3K27ac_Enh;E049,H3K27ac_Enh;E050,H3K27ac_Enh;E061,H3K27ac_Enh;E076,H3K27ac_Enh;E111,H3K27ac_Enh;E124,H3K27ac_Enh;E034,H3K4me1_Enh;E039,H3K4me1_Enh;E044,H3K4me1_Enh;E099,H3K4me3_Pro		.	GTEx2015_v6,Adrenal_Gland,TGFB1,2.84692500197426e-07;GTEx2015_v6,Artery_Tibial,AXL,1.10047915900476e-05;Lappalainen2013,Lymphoblastoid_EUR_exonlevel,ENSG00000105323.10_41809877_41810166,1.52385866610131e-07;Westra2013,Whole_Blood,BCKDHA,0.00214058770935785;Westra2013,Whole_Blood,CCDC97,0.0011008402599712293;Westra2013,Whole_Blood,HNRNPUL1,1.6907105203827592E-14	.	.	Evi-1_4;Foxa_known2;Foxa_known4;Foxp1;GATA_known8;HDAC2_disc6;Ik-2_3;Irf_disc3;TATA_disc7;Zfp105;p300_disc5	ENSG00000105323.11	HNRNPUL1	0	0	NM_007040	HNRNPUL1	0	0	INT	rs1056854
19	41290567	0.95	0.99	0	rs12327659	T	C	0.28	0.22	0.33	0.17	0	1			E001,H3K4me1_Enh;E018,H3K4me1_Enh;E038,H3K4me1_Enh;E039,H3K4me1_Enh;E040,H3K4me1_Enh;E041,H3K4me1_Enh;E042,H3K4me1_Enh;E078,H3K4me1_Enh;E002,H3K4me3_Pro;E003,H3K27ac_Enh;E008,H3K27ac_Enh;E013,H3K27ac_Enh;E014,H3K27ac_Enh;E015,H3K27ac_Enh;E016,H3K27ac_Enh;E019,H3K27ac_Enh;E021,H3K27ac_Enh;E037,H3K27ac_Enh;E039,H3K27ac_Enh;E041,H3K27ac_Enh;E042,H3K27ac_Enh;E045,H3K27ac_Enh;E050,H3K27ac_Enh;E055,H3K…	E034	.	GTEx2015_v6,Adrenal_Gland,TGFB1,2.37599594049209e-09;GTEx2015_v6,Artery_Tibial,AXL,7.36291898878459e-09;GTEx2015_v6,Lung,AXL,5.61654475976985e-06;Lappalainen2013,Lymphoblastoid_EUR_exonlevel,ENSG00000105323.10_41809877_41810166,2.55397751319387e-07;Westra2013,Whole_Blood,BCKDHA,0.0020451236487818527;Westra2013,Whole_Blood,CCDC97,0.0010461949314425323;Westra2013,Whole_Blood,HNRNPUL1,1.695992587936…	.	20502693,Gene expression of AXL in peripheral blood monocytes,3.35E-06	ATF3_known8	ENSG00000105323.11	HNRNPUL1	0	0	NM_007040	HNRNPUL1	0	0	INT	rs1056854
19	41291194	0.95	0.99	0	rs10421990	G	A	0.33	0.22	0.33	0.17	0	0			E001,H3K4me1_Enh;E018,H3K4me1_Enh;E038,H3K4me1_Enh;E039,H3K4me1_Enh;E041,H3K4me1_Enh;E045,H3K4me1_Enh;E078,H3K4me1_Enh;E008,H3K9ac_Pro;E016,H3K9ac_Pro;E018,H3K9ac_Pro;E049,H3K9ac_Pro;E063,H3K9ac_Pro;E075,H3K9ac_Pro;E101,H3K9ac_Pro;E111,H3K9ac_Pro;E013,H3K27ac_Enh;E037,H3K27ac_Enh;E039,H3K27ac_Enh;E040,H3K27ac_Enh;E041,H3K27ac_Enh;E042,H3K27ac_Enh;E045,H3K27ac_Enh;E049,H3K27ac_Enh;E050,H3K27ac_Enh…	E046;E080	.	GTEx2015_v6,Adrenal_Gland,TGFB1,1.53376178060161e-10;GTEx2015_v6,Artery_Tibial,AXL,1.70662677001048e-08;GTEx2015_v6,Lung,AXL,1.101524565452e-05;Lappalainen2013,Lymphoblastoid_EUR_exonlevel,ENSG00000105323.10_41809877_41810166,2.74061475248258e-07;Westra2013,Whole_Blood,BCKDHA,0.00202051603760725;Westra2013,Whole_Blood,CCDC97,0.0010373352172658248;Westra2013,Whole_Blood,HNRNPUL1,1.6828177510303154…	.	20502693,Gene expression of AXL in peripheral blood monocytes,3.35E-06	ERalpha-a_disc2;ERalpha-a_known1;ERalpha-a_known3;GR_known2;GR_known3;GR_known9;Hltf;SF1	ENSG00000105323.11	HNRNPUL1	0	0	NM_007040	HNRNPUL1	0	0	INT	rs1056854
19	41292206	0.95	0.99	0	rs3752705	A	G	0.28	0.22	0.33	0.17	0	0			E008,H3K9ac_Pro;E018,H3K9ac_Pro;E049,H3K9ac_Pro;E075,H3K9ac_Pro;E077,H3K9ac_Pro;E101,H3K9ac_Pro;E103,H3K9ac_Pro;E111,H3K9ac_Pro;E125,H3K9ac_Pro;E012,H3K27ac_Enh;E013,H3K27ac_Enh;E037,H3K27ac_Enh;E039,H3K27ac_Enh;E040,H3K27ac_Enh;E041,H3K27ac_Enh;E042,H3K27ac_Enh;E044,H3K27ac_Enh;E045,H3K27ac_Enh;E049,H3K27ac_Enh;E050,H3K27ac_Enh;E055,H3K27ac_Enh;E056,H3K27ac_Enh;E061,H3K27ac_Enh;E067,H3K27ac_Enh;…		.	GTEx2015_v6,Adrenal_Gland,TGFB1,4.21070776875528e-09;GTEx2015_v6,Artery_Tibial,AXL,5.59184934577967e-09;GTEx2015_v6,Lung,AXL,6.38990368023131e-06;Lappalainen2013,Lymphoblastoid_EUR_exonlevel,ENSG00000105323.10_41809877_41810166,2.70590119419938e-07;Westra2013,Whole_Blood,BCKDHA,0.00201237407241324;Westra2013,Whole_Blood,CCDC97,0.001039543613229999;Westra2013,Whole_Blood,HNRNPUL1,1.695992587936041…	.	.	ZBTB33_disc3	ENSG00000105323.11	HNRNPUL1	0	0	NM_007040	HNRNPUL1	0	0	INT	rs1056854
19	41292741	0.97	0.99	0	rs79067870	TG	T	0.06	0.16	0.27	0.16	0	0	E063,6_EnhG		E008,H3K9ac_Pro;E018,H3K9ac_Pro;E049,H3K9ac_Pro;E063,H3K9ac_Pro;E075,H3K9ac_Pro;E077,H3K9ac_Pro;E083,H3K9ac_Pro;E101,H3K9ac_Pro;E103,H3K9ac_Pro;E110,H3K9ac_Pro;E111,H3K9ac_Pro;E125,H3K9ac_Pro;E011,H3K4me1_Enh;E023,H3K4me1_Enh;E034,H3K4me1_Enh;E038,H3K4me1_Enh;E039,H3K4me1_Enh;E040,H3K4me1_Enh;E041,H3K4me1_Enh;E047,H3K4me1_Enh;E048,H3K4me1_Enh;E056,H3K4me1_Enh;E059,H3K4me1_Enh;E063,H3K4me1_Enh;E11…	E127	.	GTEx2015_v6,Adrenal_Gland,TGFB1,1.32087025976433e-07;GTEx2015_v6,Artery_Tibial,AXL,1.13084821033156e-05;Lappalainen2013,Lymphoblastoid_EUR_exonlevel,ENSG00000105323.10_41809877_41810166,1.24590460521522e-07	.	.	CHOP::CEBPalpha	ENSG00000105323.11	HNRNPUL1	0	0	NM_007040	HNRNPUL1	0	0	INT	rs1056854
19	41292755	0.97	0.99	0	rs12974420	A	G	0.06	0.16	0.27	0.16	0	0	E063,6_EnhG		E008,H3K9ac_Pro;E018,H3K9ac_Pro;E049,H3K9ac_Pro;E063,H3K9ac_Pro;E075,H3K9ac_Pro;E077,H3K9ac_Pro;E083,H3K9ac_Pro;E101,H3K9ac_Pro;E103,H3K9ac_Pro;E110,H3K9ac_Pro;E111,H3K9ac_Pro;E125,H3K9ac_Pro;E011,H3K4me1_Enh;E023,H3K4me1_Enh;E034,H3K4me1_Enh;E038,H3K4me1_Enh;E039,H3K4me1_Enh;E040,H3K4me1_Enh;E041,H3K4me1_Enh;E047,H3K4me1_Enh;E048,H3K4me1_Enh;E056,H3K4me1_Enh;E059,H3K4me1_Enh;E063,H3K4me1_Enh;E11…	E127	.	GTEx2015_v6,Adrenal_Gland,TGFB1,1.32087025976433e-07;GTEx2015_v6,Artery_Tibial,AXL,1.13321739455398e-05;Lappalainen2013,Lymphoblastoid_EUR_exonlevel,ENSG00000105323.10_41809877_41810166,1.64943960688774e-07;Westra2013,Whole_Blood,BCKDHA,0.0022001040084102547;Westra2013,Whole_Blood,CCDC97,0.0011031734294680842;Westra2013,Whole_Blood,HNRNPUL1,1.7442676455672612E-14	.	19222302,Gene expression of HNRPUL1 [probe 3834089] in peripheral blood mononuclear cells,5.52E-04;21637794,Gene expression of B9D2 in liver,0.000892814	Nkx2_1;Nkx2_2	ENSG00000105323.11	HNRNPUL1	0	0	NM_007040	HNRNPUL1	0	0	INT	rs1056854
19	41293570	0.97	0.99	0	rs2053086	T	C	0.06	0.16	0.27	0.16	0	0			E011,H3K4me1_Enh;E023,H3K4me1_Enh;E034,H3K4me1_Enh;E038,H3K4me1_Enh;E039,H3K4me1_Enh;E040,H3K4me1_Enh;E041,H3K4me1_Enh;E043,H3K4me1_Enh;E047,H3K4me1_Enh;E048,H3K4me1_Enh;E056,H3K4me1_Enh;E059,H3K4me1_Enh;E063,H3K4me1_Enh;E084,H3K4me1_Enh;E101,H3K4me1_Enh;E110,H3K4me1_Enh;E116,H3K4me1_Enh;E012,H3K27ac_Enh;E013,H3K27ac_Enh;E037,H3K27ac_Enh;E038,H3K27ac_Enh;E039,H3K27ac_Enh;E040,H3K27ac_Enh;E041,H3K…		.	GTEx2015_v6,Adrenal_Gland,TGFB1,1.31858641506978e-07;GTEx2015_v6,Artery_Tibial,AXL,1.13321739455398e-05;Lappalainen2013,Lymphoblastoid_EUR_exonlevel,ENSG00000105323.10_41809877_41810166,1.73306795880502e-07;Westra2013,Whole_Blood,BCKDHA,0.00200831439065581;Westra2013,Whole_Blood,CCDC97,0.0010528856086836908;Westra2013,Whole_Blood,HNRNPUL1,1.7442676455672612E-14	.	20502693,Gene expression of AXL in peripheral blood monocytes,3.02E-06	AP-1_disc8;Cdx;DMRT1	ENSG00000105323.11	HNRNPUL1	0	0	NM_007040	HNRNPUL1	0	0	INT	rs1056854
19	41293981	0.97	0.99	0	rs12976536	T	A	0.06	0.16	0.27	0.16	0	0			E005,H3K4me3_Pro;E055,H3K4me3_Pro;E056,H3K4me3_Pro;E083,H3K4me3_Pro;E113,H3K4me3_Pro;E006,H3K4me1_Enh;E011,H3K4me1_Enh;E034,H3K4me1_Enh;E038,H3K4me1_Enh;E039,H3K4me1_Enh;E040,H3K4me1_Enh;E041,H3K4me1_Enh;E043,H3K4me1_Enh;E045,H3K4me1_Enh;E047,H3K4me1_Enh;E048,H3K4me1_Enh;E055,H3K4me1_Enh;E056,H3K4me1_Enh;E059,H3K4me1_Enh;E061,H3K4me1_Enh;E069,H3K4me1_Enh;E084,H3K4me1_Enh;E085,H3K4me1_Enh;E094,H3K…		.	GTEx2015_v6,Adrenal_Gland,TGFB1,1.31630800095456e-07;GTEx2015_v6,Artery_Tibial,AXL,1.13321739455398e-05;Lappalainen2013,Lymphoblastoid_EUR_exonlevel,ENSG00000105323.10_41809877_41810166,1.52050320503521e-07	.	.	AhR_1	ENSG00000105323.11	HNRNPUL1	0	0	NM_007040	HNRNPUL1	0	0	INT	rs1056854
19	41295851	0.97	0.99	0	rs12985339	A	T	0.06	0.16	0.27	0.16	0	0	E027,6_EnhG;E037,6_EnhG;E038,6_EnhG;E040,6_EnhG;E042,6_EnhG;E043,6_EnhG;E045,6_EnhG;E046,6_EnhG;E049,6_EnhG;E050,6_EnhG;E055,6_EnhG;E057,6_EnhG;E059,6_EnhG;E062,6_EnhG;E077,6_EnhG;E078,6_EnhG;E080,6_EnhG;E083,6_EnhG;E084,6_EnhG;E085,6_EnhG;E087,7_Enh;E090,6_EnhG;E094,6_EnhG;E095,6_EnhG;E110,6_EnhG;E116,6_EnhG;E119,6_EnhG	E023,10_TxEnh5;E025,10_TxEnh5;E026,10_TxEnh5;E027,10_TxEnh5;E031,10_TxEnh5;E033,10_TxEnh5;E034,10_TxEnh5;E035,10_TxEnh5;E037,10_TxEnh5;E038,10_TxEnh5;E039,10_TxEnh5;E040,10_TxEnh5;E041,10_TxEnh5;E042,10_TxEnh5;E043,10_TxEnh5;E045,10_TxEnh5;E046,10_TxEnh5;E047,10_TxEnh5;E048,10_TxEnh5;E049,9_TxReg;E050,10_TxEnh5;E051,10_TxEnh5;E052,10_TxEnh5;E062,10_TxEnh5;E063,10_TxEnh5;E076,10_TxEnh5;E077,10_TxE…	E007,H3K9ac_Pro;E023,H3K9ac_Pro;E025,H3K9ac_Pro;E026,H3K9ac_Pro;E027,H3K9ac_Pro;E038,H3K9ac_Pro;E049,H3K9ac_Pro;E052,H3K9ac_Pro;E062,H3K9ac_Pro;E063,H3K9ac_Pro;E066,H3K9ac_Pro;E067,H3K9ac_Pro;E068,H3K9ac_Pro;E069,H3K9ac_Pro;E072,H3K9ac_Pro;E073,H3K9ac_Pro;E074,H3K9ac_Pro;E075,H3K9ac_Pro;E076,H3K9ac_Pro;E077,H3K9ac_Pro;E083,H3K9ac_Pro;E087,H3K9ac_Pro;E088,H3K9ac_Pro;E102,H3K9ac_Pro;E103,H3K9ac_Pro…	E032;E034;E059;E080;E084;E085;E092;E093;E116	.	GTEx2015_v6,Adrenal_Gland,TGFB1,1.31176741073055e-07;GTEx2015_v6,Artery_Tibial,AXL,1.13321739455398e-05;Lappalainen2013,Lymphoblastoid_EUR_exonlevel,ENSG00000105323.10_41809877_41810166,1.43516986182642e-07;Westra2013,Whole_Blood,BCKDHA,0.00200831439065581;Westra2013,Whole_Blood,CCDC97,0.0010528856086836908;Westra2013,Whole_Blood,HNRNPUL1,1.7442676455672612E-14	.	20502693,Gene expression of AXL in peripheral blood monocytes,8.34E-06;20502693,Gene expression of HNRPUL1 in peripheral blood monocytes,8.49E-06	.	ENSG00000105323.11	HNRNPUL1	0	0	NM_007040	HNRNPUL1	0	0	INT	rs1056854
19	41298750	0.95	0.99	0	rs12980480	A	G	0.28	0.22	0.33	0.17	0	0	E005,6_EnhG;E006,6_EnhG;E010,6_EnhG;E017,6_EnhG;E023,3_TxFlnk;E025,6_EnhG;E026,6_EnhG;E027,6_EnhG;E029,6_EnhG;E031,6_EnhG;E032,6_EnhG;E033,6_EnhG;E034,6_EnhG;E035,6_EnhG;E036,6_EnhG;E037,7_Enh;E038,6_EnhG;E039,6_EnhG;E040,7_Enh;E041,6_EnhG;E042,6_EnhG;E043,6_EnhG;E044,6_EnhG;E045,6_EnhG;E046,6_EnhG;E047,7_Enh;E048,6_EnhG;E049,2_TssAFlnk;E050,6_EnhG;E051,2_TssAFlnk;E052,6_EnhG;E054,6_EnhG;E055,3_T…	E004,11_TxEnh3;E005,11_TxEnh3;E006,10_TxEnh5;E007,11_TxEnh3;E008,11_TxEnh3;E009,11_TxEnh3;E010,10_TxEnh5;E011,11_TxEnh3;E012,10_TxEnh5;E013,9_TxReg;E017,9_TxReg;E022,11_TxEnh3;E023,9_TxReg;E024,11_TxEnh3;E025,9_TxReg;E026,9_TxReg;E027,9_TxReg;E028,10_TxEnh5;E029,10_TxEnh5;E030,10_TxEnh5;E031,9_TxReg;E032,9_TxReg;E033,10_TxEnh5;E034,9_TxReg;E035,9_TxReg;E036,9_TxReg;E037,9_TxReg;E038,9_TxReg;E039,…	E005,H3K27ac_Enh;E006,H3K27ac_Enh;E011,H3K27ac_Enh;E012,H3K27ac_Enh;E013,H3K27ac_Enh;E014,H3K27ac_Enh;E015,H3K27ac_Enh;E016,H3K27ac_Enh;E017,H3K27ac_Enh;E026,H3K27ac_Enh;E029,H3K27ac_Enh;E032,H3K27ac_Enh;E034,H3K27ac_Enh;E037,H3K27ac_Enh;E038,H3K27ac_Enh;E039,H3K27ac_Enh;E040,H3K27ac_Enh;E041,H3K27ac_Enh;E042,H3K27ac_Enh;E043,H3K27ac_Enh;E044,H3K27ac_Enh;E045,H3K27ac_Enh;E046,H3K27ac_Enh;E047,H3K…	E005;E006;E017;E032;E033;E034;E050;E051;E056;E059;E080;E082;E083;E086;E088;E089;E090;E091;E097;E109;E116;E120;E121;E125;E126	.	GTEx2015_v6,Adrenal_Gland,TGFB1,4.21070776875528e-09;GTEx2015_v6,Artery_Tibial,AXL,6.07510640725161e-09;GTEx2015_v6,Lung,AXL,6.89943106250811e-06;Lappalainen2013,Lymphoblastoid_EUR_exonlevel,ENSG00000105323.10_41809877_41810166,2.59802263164728e-07;Westra2013,Whole_Blood,BCKDHA,0.0019469998417077272;Westra2013,Whole_Blood,CCDC97,0.0010528856086836908;Westra2013,Whole_Blood,HNRNPUL1,1.873863985379…	.	.	EWSR1-FLI1;Egr-1_known2;Irf_disc4;Pax-5_known1;SP1_disc3;SP1_known1;TATA_disc4	ENSG00000105323.11	HNRNPUL1	0	0	NM_007040	HNRNPUL1	0	0	INT	rs1056854
19	41299071	0.95	0.99	0	rs11879562	G	C	0.29	0.22	0.33	0.17	0	1	E005,6_EnhG;E006,6_EnhG;E010,6_EnhG;E017,6_EnhG;E023,2_TssAFlnk;E025,6_EnhG;E026,6_EnhG;E027,6_EnhG;E031,6_EnhG;E032,6_EnhG;E033,6_EnhG;E034,6_EnhG;E035,6_EnhG;E036,6_EnhG;E037,7_Enh;E038,6_EnhG;E039,6_EnhG;E040,7_Enh;E041,6_EnhG;E042,6_EnhG;E043,6_EnhG;E044,6_EnhG;E045,6_EnhG;E046,6_EnhG;E047,7_Enh;E048,6_EnhG;E049,2_TssAFlnk;E050,6_EnhG;E051,2_TssAFlnk;E052,6_EnhG;E054,6_EnhG;E055,3_TxFlnk;E056…	E005,11_TxEnh3;E006,10_TxEnh5;E007,11_TxEnh3;E009,11_TxEnh3;E010,10_TxEnh5;E011,11_TxEnh3;E012,11_TxEnh3;E013,10_TxEnh5;E017,10_TxEnh5;E022,11_TxEnh3;E023,9_TxReg;E025,9_TxReg;E026,9_TxReg;E027,9_TxReg;E028,10_TxEnh5;E029,10_TxEnh5;E030,10_TxEnh5;E031,9_TxReg;E032,9_TxReg;E033,10_TxEnh5;E034,9_TxReg;E035,10_TxEnh5;E036,9_TxReg;E037,9_TxReg;E038,9_TxReg;E039,10_TxEnh5;E040,9_TxReg;E041,9_TxReg;E04…	E005,H3K27ac_Enh;E006,H3K27ac_Enh;E011,H3K27ac_Enh;E012,H3K27ac_Enh;E013,H3K27ac_Enh;E014,H3K27ac_Enh;E015,H3K27ac_Enh;E016,H3K27ac_Enh;E017,H3K27ac_Enh;E026,H3K27ac_Enh;E029,H3K27ac_Enh;E032,H3K27ac_Enh;E034,H3K27ac_Enh;E037,H3K27ac_Enh;E038,H3K27ac_Enh;E039,H3K27ac_Enh;E040,H3K27ac_Enh;E041,H3K27ac_Enh;E042,H3K27ac_Enh;E043,H3K27ac_Enh;E044,H3K27ac_Enh;E045,H3K27ac_Enh;E046,H3K27ac_Enh;E047,H3K…	E006;E032;E033;E034;E046;E050;E051;E059;E083;E088;E090;E100;E121	.	GTEx2015_v6,Adrenal_Gland,TGFB1,4.21070776875528e-09;GTEx2015_v6,Artery_Tibial,AXL,6.07510640725161e-09;GTEx2015_v6,Lung,AXL,6.89943106250811e-06;Lappalainen2013,Lymphoblastoid_EUR_exonlevel,ENSG00000105323.10_41809877_41810166,2.65768621525326e-07;Westra2013,Whole_Blood,BCKDHA,0.0019509456200234368;Westra2013,Whole_Blood,CCDC97,0.0010212724906373432;Westra2013,Whole_Blood,HNRNPUL1,1.873863985379…	.	20502693,Gene expression of AXL in peripheral blood monocytes,2.84E-06	.	ENSG00000105323.11	HNRNPUL1	0	0	NM_007040	HNRNPUL1	0	0	INT	rs1056854
19	41300742	0.95	0.99	0	rs7258749	C	T	0.29	0.22	0.33	0.17	0	0	E027,6_EnhG;E031,6_EnhG;E032,6_EnhG;E033,6_EnhG;E034,6_EnhG;E035,6_EnhG;E037,6_EnhG;E038,6_EnhG;E039,6_EnhG;E040,6_EnhG;E041,6_EnhG;E042,7_Enh;E043,6_EnhG;E045,6_EnhG;E046,6_EnhG;E047,7_Enh;E048,7_Enh;E049,6_EnhG;E050,6_EnhG;E051,3_TxFlnk;E059,7_Enh;E062,6_EnhG;E063,6_EnhG;E076,6_EnhG;E077,6_EnhG;E078,6_EnhG;E083,6_EnhG;E087,7_Enh;E089,6_EnhG;E090,6_EnhG;E091,6_EnhG;E095,6_EnhG;E100,7_Enh;E101,6_…	E023,10_TxEnh5;E025,10_TxEnh5;E026,10_TxEnh5;E027,10_TxEnh5;E029,11_TxEnh3;E030,10_TxEnh5;E031,10_TxEnh5;E032,10_TxEnh5;E033,10_TxEnh5;E034,10_TxEnh5;E035,10_TxEnh5;E036,10_TxEnh5;E037,10_TxEnh5;E038,10_TxEnh5;E039,10_TxEnh5;E040,9_TxReg;E041,9_TxReg;E042,9_TxReg;E043,10_TxEnh5;E044,10_TxEnh5;E045,9_TxReg;E046,10_TxEnh5;E047,10_TxEnh5;E048,10_TxEnh5;E049,9_TxReg;E050,9_TxReg;E051,9_TxReg;E052,10_…	E005,H3K9ac_Pro;E007,H3K9ac_Pro;E015,H3K9ac_Pro;E023,H3K9ac_Pro;E025,H3K9ac_Pro;E026,H3K9ac_Pro;E049,H3K9ac_Pro;E052,H3K9ac_Pro;E062,H3K9ac_Pro;E063,H3K9ac_Pro;E066,H3K9ac_Pro;E067,H3K9ac_Pro;E068,H3K9ac_Pro;E069,H3K9ac_Pro;E072,H3K9ac_Pro;E073,H3K9ac_Pro;E074,H3K9ac_Pro;E075,H3K9ac_Pro;E076,H3K9ac_Pro;E077,H3K9ac_Pro;E083,H3K9ac_Pro;E087,H3K9ac_Pro;E088,H3K9ac_Pro;E101,H3K9ac_Pro;E102,H3K9ac_Pro…	E032;E033;E034;E050;E051;E083;E086;E089;E090;E093	.	GTEx2015_v6,Adrenal_Gland,TGFB1,4.21070776875528e-09;GTEx2015_v6,Artery_Tibial,AXL,6.07510640725161e-09;GTEx2015_v6,Lung,AXL,6.89943106250811e-06;Lappalainen2013,Lymphoblastoid_EUR_exonlevel,ENSG00000105323.10_41809877_41810166,2.73815466879757e-07;Westra2013,Whole_Blood,BCKDHA,0.0019509456200234368;Westra2013,Whole_Blood,CCDC97,0.0010191000430672336;Westra2013,Whole_Blood,HNRNPUL1,1.865130740921…	.	.	HEN1_1;NRSF_disc5;Pax-6_2;Rad21_disc7	ENSG00000105323.11	HNRNPUL1	0	0	NM_007040	HNRNPUL1	0	0	INT	rs1056854
19	41301166	0.95	0.99	0	rs12974323	A	G	0.29	0.22	0.33	0.17	0	0	E031,6_EnhG;E032,6_EnhG;E033,6_EnhG;E034,6_EnhG;E035,6_EnhG;E037,6_EnhG;E038,6_EnhG;E039,6_EnhG;E040,7_Enh;E041,6_EnhG;E042,7_Enh;E043,6_EnhG;E045,6_EnhG;E046,6_EnhG;E047,7_Enh;E048,7_Enh;E050,6_EnhG;E051,3_TxFlnk;E062,6_EnhG;E063,6_EnhG;E077,6_EnhG;E078,6_EnhG;E083,6_EnhG;E090,6_EnhG;E091,6_EnhG;E108,6_EnhG;E111,6_EnhG;E116,6_EnhG	E029,11_TxEnh3;E030,10_TxEnh5;E031,10_TxEnh5;E032,10_TxEnh5;E033,10_TxEnh5;E034,10_TxEnh5;E035,10_TxEnh5;E036,11_TxEnh3;E037,10_TxEnh5;E038,10_TxEnh5;E039,10_TxEnh5;E040,10_TxEnh5;E041,10_TxEnh5;E042,10_TxEnh5;E043,10_TxEnh5;E044,10_TxEnh5;E045,10_TxEnh5;E046,10_TxEnh5;E047,10_TxEnh5;E048,10_TxEnh5;E050,9_TxReg;E051,9_TxReg;E062,10_TxEnh5;E063,10_TxEnh5;E076,10_TxEnh5;E078,10_TxEnh5;E083,11_TxEnh…	E013,H3K27ac_Enh;E014,H3K27ac_Enh;E016,H3K27ac_Enh;E032,H3K27ac_Enh;E034,H3K27ac_Enh;E037,H3K27ac_Enh;E038,H3K27ac_Enh;E039,H3K27ac_Enh;E040,H3K27ac_Enh;E041,H3K27ac_Enh;E042,H3K27ac_Enh;E043,H3K27ac_Enh;E044,H3K27ac_Enh;E045,H3K27ac_Enh;E046,H3K27ac_Enh;E047,H3K27ac_Enh;E048,H3K27ac_Enh;E049,H3K27ac_Enh;E050,H3K27ac_Enh;E055,H3K27ac_Enh;E058,H3K27ac_Enh;E061,H3K27ac_Enh;E062,H3K27ac_Enh;E063,H3K…	E034	.	GTEx2015_v6,Adrenal_Gland,TGFB1,4.21070776875528e-09;GTEx2015_v6,Artery_Tibial,AXL,1.2970211290375e-08;GTEx2015_v6,Lung,AXL,8.89523894280698e-06;Lappalainen2013,Lymphoblastoid_EUR_exonlevel,ENSG00000105323.10_41809877_41810166,2.62655767302092e-07	.	.	ZBRK1	ENSG00000105323.11	HNRNPUL1	0	0	NM_007040	HNRNPUL1	0	0	INT	rs1056854
19	41301795	0.95	0.99	0	rs7248164	G	A	0.34	0.22	0.33	0.17	0	0	E031,6_EnhG;E032,6_EnhG;E033,6_EnhG;E034,6_EnhG;E035,6_EnhG;E037,6_EnhG;E038,6_EnhG;E039,6_EnhG;E040,7_Enh;E041,6_EnhG;E042,6_EnhG;E043,6_EnhG;E044,6_EnhG;E045,6_EnhG;E046,6_EnhG;E047,7_Enh;E048,6_EnhG;E050,6_EnhG;E051,6_EnhG;E062,6_EnhG;E063,6_EnhG;E077,6_EnhG;E078,6_EnhG;E090,6_EnhG;E091,6_EnhG;E108,6_EnhG;E113,6_EnhG;E115,6_EnhG;E116,6_EnhG	E029,11_TxEnh3;E030,10_TxEnh5;E031,10_TxEnh5;E032,10_TxEnh5;E033,10_TxEnh5;E034,9_TxReg;E035,10_TxEnh5;E036,10_TxEnh5;E037,10_TxEnh5;E038,10_TxEnh5;E039,10_TxEnh5;E040,9_TxReg;E041,10_TxEnh5;E042,10_TxEnh5;E043,9_TxReg;E044,10_TxEnh5;E045,10_TxEnh5;E046,9_TxReg;E047,10_TxEnh5;E048,10_TxEnh5;E050,9_TxReg;E051,10_TxEnh5;E062,10_TxEnh5;E063,10_TxEnh5;E076,10_TxEnh5;E077,10_TxEnh5;E078,10_TxEnh5;E089…	E007,H3K9ac_Pro;E023,H3K9ac_Pro;E025,H3K9ac_Pro;E049,H3K9ac_Pro;E052,H3K9ac_Pro;E062,H3K9ac_Pro;E063,H3K9ac_Pro;E067,H3K9ac_Pro;E069,H3K9ac_Pro;E072,H3K9ac_Pro;E073,H3K9ac_Pro;E074,H3K9ac_Pro;E075,H3K9ac_Pro;E076,H3K9ac_Pro;E077,H3K9ac_Pro;E083,H3K9ac_Pro;E087,H3K9ac_Pro;E088,H3K9ac_Pro;E102,H3K9ac_Pro;E107,H3K9ac_Pro;E108,H3K9ac_Pro;E110,H3K9ac_Pro;E111,H3K9ac_Pro;E115,H3K9ac_Pro;E119,H3K9ac_Pro…		.	GTEx2015_v6,Adrenal_Gland,TGFB1,6.15237564510106e-10;GTEx2015_v6,Artery_Tibial,AXL,1.23706193214e-08;Lappalainen2013,Lymphoblastoid_EUR_exonlevel,ENSG00000105323.10_41809877_41810166,2.70590119419938e-07;Westra2013,Whole_Blood,BCKDHA,0.0019469998417077272;Westra2013,Whole_Blood,CCDC97,0.0010191000430672336;Westra2013,Whole_Blood,HNRNPUL1,1.873863985379848E-14	.	.	BATF_disc3;Gfi1_1;Gfi1_2;Gfi1_3	ENSG00000105323.11	HNRNPUL1	0	0	NM_007040	HNRNPUL1	0	0	INT	rs1056854
		0.97	0.99	0	rs72210607	CTT	C	0.06	0.16	0.27	0.16	0	0	E029,6_EnhG;E031,6_EnhG;E032,6_EnhG;E033,6_EnhG;E034,6_EnhG;E035,6_EnhG;E036,6_EnhG;E037,7_Enh;E038,7_Enh;E039,6_EnhG;E040,7_Enh;E041,6_EnhG;E042,6_EnhG;E043,6_EnhG;E044,6_EnhG;E045,7_Enh;E046,6_EnhG;E047,7_Enh;E048,7_Enh;E050,6_EnhG;E051,6_EnhG;E062,6_EnhG;E063,6_EnhG;E077,6_EnhG;E089,6_EnhG;E090,6_EnhG;E093,6_EnhG;E113,6_EnhG;E115,6_EnhG;E116,6_EnhG	E029,11_TxEnh3;E030,10_TxEnh5;E031,10_TxEnh5;E032,10_TxEnh5;E033,10_TxEnh5;E034,9_TxReg;E035,11_TxEnh3;E036,11_TxEnh3;E037,10_TxEnh5;E038,10_TxEnh5;E039,10_TxEnh5;E040,9_TxReg;E041,9_TxReg;E042,10_TxEnh5;E043,9_TxReg;E044,10_TxEnh5;E045,10_TxEnh5;E046,9_TxReg;E047,11_TxEnh3;E048,10_TxEnh5;E050,10_TxEnh5;E051,10_TxEnh5;E062,10_TxEnh5;E077,10_TxEnh5;E078,11_TxEnh3;E091,11_TxEnh3;E093,11_TxEnh3;E101…	E007,H3K9ac_Pro;E023,H3K9ac_Pro;E062,H3K9ac_Pro;E063,H3K9ac_Pro;E067,H3K9ac_Pro;E069,H3K9ac_Pro;E074,H3K9ac_Pro;E075,H3K9ac_Pro;E076,H3K9ac_Pro;E077,H3K9ac_Pro;E083,H3K9ac_Pro;E087,H3K9ac_Pro;E102,H3K9ac_Pro;E107,H3K9ac_Pro;E108,H3K9ac_Pro;E110,H3K9ac_Pro;E111,H3K9ac_Pro;E115,H3K9ac_Pro;E116,H3K9ac_Pro;E119,H3K9ac_Pro;E125,H3K9ac_Pro;E013,H3K27ac_Enh;E016,H3K27ac_Enh;E029,H3K27ac_Enh;E032,H3K27ac…		.	Lappalainen2013,Lymphoblastoid_EUR_exonlevel,ENSG00000105323.10_41809877_41810166,1.41901076886177e-07	.	.	Foxa_known2;Foxp1;GATA_known8;HDAC2_disc6;Irf_disc3;TATA_disc7;Zfp105;p300_disc5	ENSG00000105323.11	HNRNPUL1	0	0	NM_007040	HNRNPUL1	0	0	INT	rs1056854
19	41302344	0.93	0.98	0	rs11881953	G	A	0.07	0.15	0.27	0.16	0	0	E029,6_EnhG;E030,6_EnhG;E031,6_EnhG;E032,6_EnhG;E033,6_EnhG;E034,6_EnhG;E035,6_EnhG;E036,6_EnhG;E037,7_Enh;E038,7_Enh;E039,6_EnhG;E040,7_Enh;E041,6_EnhG;E042,6_EnhG;E043,6_EnhG;E044,6_EnhG;E045,7_Enh;E046,6_EnhG;E047,7_Enh;E048,7_Enh;E050,6_EnhG;E051,6_EnhG;E062,6_EnhG;E063,6_EnhG;E077,6_EnhG;E089,6_EnhG;E090,6_EnhG;E093,6_EnhG;E113,6_EnhG;E115,6_EnhG;E116,6_EnhG	E029,11_TxEnh3;E030,10_TxEnh5;E031,10_TxEnh5;E032,10_TxEnh5;E033,10_TxEnh5;E034,9_TxReg;E035,11_TxEnh3;E036,11_TxEnh3;E037,10_TxEnh5;E038,10_TxEnh5;E039,10_TxEnh5;E040,9_TxReg;E041,9_TxReg;E042,10_TxEnh5;E043,9_TxReg;E044,10_TxEnh5;E045,10_TxEnh5;E046,9_TxReg;E047,11_TxEnh3;E048,10_TxEnh5;E050,10_TxEnh5;E051,10_TxEnh5;E062,10_TxEnh5;E078,11_TxEnh3;E091,11_TxEnh3;E093,11_TxEnh3;E101,11_TxEnh3;E106…	E007,H3K9ac_Pro;E023,H3K9ac_Pro;E062,H3K9ac_Pro;E063,H3K9ac_Pro;E069,H3K9ac_Pro;E074,H3K9ac_Pro;E075,H3K9ac_Pro;E076,H3K9ac_Pro;E077,H3K9ac_Pro;E083,H3K9ac_Pro;E087,H3K9ac_Pro;E102,H3K9ac_Pro;E107,H3K9ac_Pro;E108,H3K9ac_Pro;E110,H3K9ac_Pro;E111,H3K9ac_Pro;E115,H3K9ac_Pro;E116,H3K9ac_Pro;E119,H3K9ac_Pro;E125,H3K9ac_Pro;E013,H3K27ac_Enh;E016,H3K27ac_Enh;E029,H3K27ac_Enh;E032,H3K27ac_Enh;E034,H3K27a…		.	GTEx2015_v6,Adrenal_Gland,TGFB1,2.22276965501945e-07;GTEx2015_v6,Artery_Tibial,AXL,1.25921804263956e-05;Lappalainen2013,Lymphoblastoid_EUR_exonlevel,ENSG00000105323.10_41809877_41810166,2.20616344225595e-07	.	.	BDP1_disc3;LUN-1	ENSG00000105323.11	HNRNPUL1	0	0	NM_007040	HNRNPUL1	0	0	INT	rs1056854
19	41302527	0.97	0.99	0	rs11881940	A	T	0.06	0.16	0.27	0.16	0	0	E029,6_EnhG;E030,6_EnhG;E031,6_EnhG;E032,6_EnhG;E033,6_EnhG;E034,6_EnhG;E035,6_EnhG;E036,6_EnhG;E037,7_Enh;E038,7_Enh;E039,6_EnhG;E040,7_Enh;E041,2_TssAFlnk;E042,3_TxFlnk;E043,3_TxFlnk;E044,6_EnhG;E045,7_Enh;E046,6_EnhG;E047,7_Enh;E048,7_Enh;E050,6_EnhG;E051,6_EnhG;E062,6_EnhG;E063,6_EnhG;E077,6_EnhG;E089,6_EnhG;E090,6_EnhG;E093,6_EnhG;E113,6_EnhG;E115,6_EnhG;E116,2_TssAFlnk;E124,6_EnhG	E029,10_TxEnh5;E030,10_TxEnh5;E031,10_TxEnh5;E032,9_TxReg;E033,10_TxEnh5;E034,9_TxReg;E035,11_TxEnh3;E036,10_TxEnh5;E037,9_TxReg;E038,9_TxReg;E039,9_TxReg;E040,9_TxReg;E041,9_TxReg;E042,9_TxReg;E043,9_TxReg;E044,9_TxReg;E045,9_TxReg;E046,9_TxReg;E047,11_TxEnh3;E048,9_TxReg;E050,9_TxReg;E051,10_TxEnh5;E062,10_TxEnh5;E063,10_TxEnh5;E066,11_TxEnh3;E075,11_TxEnh3;E077,10_TxEnh5;E078,11_TxEnh3;E091,11…	E007,H3K9ac_Pro;E023,H3K9ac_Pro;E038,H3K9ac_Pro;E062,H3K9ac_Pro;E063,H3K9ac_Pro;E069,H3K9ac_Pro;E074,H3K9ac_Pro;E075,H3K9ac_Pro;E076,H3K9ac_Pro;E077,H3K9ac_Pro;E083,H3K9ac_Pro;E087,H3K9ac_Pro;E102,H3K9ac_Pro;E107,H3K9ac_Pro;E108,H3K9ac_Pro;E110,H3K9ac_Pro;E111,H3K9ac_Pro;E115,H3K9ac_Pro;E116,H3K9ac_Pro;E119,H3K9ac_Pro;E125,H3K9ac_Pro;E013,H3K27ac_Enh;E016,H3K27ac_Enh;E029,H3K27ac_Enh;E032,H3K27ac…	E033;E034;E046;E116	GM12891,NFKB,Stanford,None	GTEx2015_v6,Adrenal_Gland,TGFB1,1.2903525162027e-07;GTEx2015_v6,Artery_Tibial,AXL,1.13514997799536e-05;Lappalainen2013,Lymphoblastoid_EUR_exonlevel,ENSG00000105323.10_41809877_41810166,1.56232256497237e-07;Westra2013,Whole_Blood,BCKDHA,0.0019391302571001082;Westra2013,Whole_Blood,CCDC97,0.0010212724906373432;Westra2013,Whole_Blood,HNRNPUL1,1.8826374549426193E-14	.	.	Irf_disc3;Nanog_disc2;Sox_13;Sox_4	ENSG00000105323.11	HNRNPUL1	0	0	NM_007040	HNRNPUL1	0	0	INT	rs1056854
19	41304090	1	1	1	rs1056854	A	G	0.06	0.16	0.22	0.16	1	1			E003,H3K9ac_Pro;E007,H3K9ac_Pro;E023,H3K9ac_Pro;E025,H3K9ac_Pro;E038,H3K9ac_Pro;E049,H3K9ac_Pro;E062,H3K9ac_Pro;E063,H3K9ac_Pro;E069,H3K9ac_Pro;E075,H3K9ac_Pro;E076,H3K9ac_Pro;E077,H3K9ac_Pro;E083,H3K9ac_Pro;E101,H3K9ac_Pro;E107,H3K9ac_Pro;E110,H3K9ac_Pro;E111,H3K9ac_Pro;E115,H3K9ac_Pro;E011,H3K4me1_Enh;E012,H3K4me1_Enh;E022,H3K4me1_Enh;E027,H3K4me1_Enh;E031,H3K4me1_Enh;E032,H3K4me1_Enh;E033,H3K4…	E033;E034;E046;E050;E097;E118	.	GTEx2015_v6,Adrenal_Gland,TGFB1,1.45098605723649e-06;GTEx2015_v6,Artery_Tibial,AXL,1.31628209740871e-05;Lappalainen2013,Lymphoblastoid_EUR_exonlevel,ENSG00000105323.10_41809877_41810166,1.77313527847953e-07;Westra2013,Whole_Blood,BCKDHA,0.0024374524789543646;Westra2013,Whole_Blood,CCDC97,0.0010663858856438152;Westra2013,Whole_Blood,HNRNPUL1,2.0927034858023458E-14	.	.	ELF1_disc3;ETF;Mxi1_disc1;Myb_1;Myc_disc10;NRSF_disc8;NRSF_disc9;Pou2f2_disc2;SREBP_disc1;Sin3Ak-20_disc7	ENSG00000105323.11	HNRNPUL1	0	0	NM_007040	HNRNPUL1	0	0	SYN	rs1056854
19	41304739	0.89	0.99	0	rs7245398	A	G	0.49	0.24	0.33	0.18	0	0	E031,6_EnhG;E032,6_EnhG;E033,3_TxFlnk;E034,3_TxFlnk;E035,6_EnhG;E037,3_TxFlnk;E038,6_EnhG;E039,6_EnhG;E040,3_TxFlnk;E041,3_TxFlnk;E042,3_TxFlnk;E043,6_EnhG;E044,6_EnhG;E045,3_TxFlnk;E046,6_EnhG;E047,6_EnhG;E048,6_EnhG;E049,6_EnhG;E050,6_EnhG;E051,6_EnhG;E062,6_EnhG;E063,6_EnhG;E077,6_EnhG;E078,6_EnhG;E079,6_EnhG;E089,6_EnhG;E090,6_EnhG;E093,6_EnhG;E107,6_EnhG;E108,6_EnhG;E111,6_EnhG;E112,6_EnhG;E…	E023,11_TxEnh3;E025,11_TxEnh3;E029,10_TxEnh5;E030,10_TxEnh5;E031,10_TxEnh5;E032,10_TxEnh5;E033,10_TxEnh5;E034,9_TxReg;E035,10_TxEnh5;E036,10_TxEnh5;E037,9_TxReg;E038,9_TxReg;E039,9_TxReg;E040,9_TxReg;E041,9_TxReg;E042,9_TxReg;E043,9_TxReg;E044,10_TxEnh5;E045,9_TxReg;E046,9_TxReg;E047,9_TxReg;E048,9_TxReg;E049,10_TxEnh5;E050,9_TxReg;E051,9_TxReg;E062,10_TxEnh5;E063,10_TxEnh5;E076,10_TxEnh5;E077,10…	E003,H3K9ac_Pro;E011,H3K9ac_Pro;E023,H3K9ac_Pro;E025,H3K9ac_Pro;E027,H3K9ac_Pro;E038,H3K9ac_Pro;E049,H3K9ac_Pro;E062,H3K9ac_Pro;E063,H3K9ac_Pro;E066,H3K9ac_Pro;E067,H3K9ac_Pro;E068,H3K9ac_Pro;E069,H3K9ac_Pro;E072,H3K9ac_Pro;E075,H3K9ac_Pro;E076,H3K9ac_Pro;E077,H3K9ac_Pro;E083,H3K9ac_Pro;E101,H3K9ac_Pro;E102,H3K9ac_Pro;E107,H3K9ac_Pro;E108,H3K9ac_Pro;E110,H3K9ac_Pro;E111,H3K9ac_Pro;E115,H3K9ac_Pro…	E034;E046;E089;E098	.	GTEx2015_v6,Adrenal_Gland,TGFB1,4.35973554104287e-08;GTEx2015_v6,Artery_Tibial,AXL,2.03794527296886e-08;GTEx2015_v6,Lung,AXL,3.11502616505138e-06;Lappalainen2013,Lymphoblastoid_EUR_exonlevel,ENSG00000105323.10_41809877_41810166,5.82200199265262e-07;Westra2013,Whole_Blood,BCKDHA,3.6719996300203913E-4;Westra2013,Whole_Blood,CCDC97,4.133661287661279E-4;Westra2013,Whole_Blood,HNRNPUL1,9.8591232652250…	.	.	Bcl6b;Irf_known10;PU.1_disc1;STAT_disc1;STAT_known11;STAT_known14;STAT_known7	ENSG00000105323.11	HNRNPUL1	0	0	NM_007040	HNRNPUL1	0	0	INT	rs1056854
19	41304866	0.91	0.99	0	rs12972266	G	A	0.06	0.17	0.27	0.17	0	0	E031,6_EnhG;E032,6_EnhG;E033,3_TxFlnk;E034,3_TxFlnk;E035,6_EnhG;E037,3_TxFlnk;E038,6_EnhG;E039,6_EnhG;E040,3_TxFlnk;E041,3_TxFlnk;E042,3_TxFlnk;E043,6_EnhG;E044,6_EnhG;E045,3_TxFlnk;E046,6_EnhG;E047,6_EnhG;E048,6_EnhG;E049,6_EnhG;E050,6_EnhG;E051,6_EnhG;E062,6_EnhG;E063,6_EnhG;E077,6_EnhG;E078,6_EnhG;E079,6_EnhG;E089,6_EnhG;E090,6_EnhG;E093,6_EnhG;E107,6_EnhG;E108,6_EnhG;E111,6_EnhG;E112,6_EnhG;E…	E023,11_TxEnh3;E025,11_TxEnh3;E029,10_TxEnh5;E030,10_TxEnh5;E031,10_TxEnh5;E032,10_TxEnh5;E033,10_TxEnh5;E034,9_TxReg;E035,10_TxEnh5;E036,10_TxEnh5;E037,9_TxReg;E038,9_TxReg;E039,9_TxReg;E040,9_TxReg;E041,9_TxReg;E042,9_TxReg;E043,9_TxReg;E044,10_TxEnh5;E045,9_TxReg;E046,9_TxReg;E047,9_TxReg;E048,9_TxReg;E049,10_TxEnh5;E050,9_TxReg;E051,9_TxReg;E062,10_TxEnh5;E063,10_TxEnh5;E076,10_TxEnh5;E077,10…	E003,H3K9ac_Pro;E011,H3K9ac_Pro;E023,H3K9ac_Pro;E025,H3K9ac_Pro;E027,H3K9ac_Pro;E038,H3K9ac_Pro;E049,H3K9ac_Pro;E062,H3K9ac_Pro;E063,H3K9ac_Pro;E066,H3K9ac_Pro;E067,H3K9ac_Pro;E068,H3K9ac_Pro;E069,H3K9ac_Pro;E072,H3K9ac_Pro;E075,H3K9ac_Pro;E076,H3K9ac_Pro;E077,H3K9ac_Pro;E083,H3K9ac_Pro;E101,H3K9ac_Pro;E102,H3K9ac_Pro;E107,H3K9ac_Pro;E108,H3K9ac_Pro;E110,H3K9ac_Pro;E111,H3K9ac_Pro;E115,H3K9ac_Pro…	E034;E098;E114	.	GTEx2015_v6,Adrenal_Gland,TGFB1,5.16303115702686e-08;Lappalainen2013,Lymphoblastoid_EUR_exonlevel,ENSG00000105323.10_41809877_41810166,4.17174067473164e-07	.	.	Mef2_disc2;RFX5_known3;SP2_disc1;STAT_known4;STAT_known7	ENSG00000105323.11	HNRNPUL1	0	0	NM_007040	HNRNPUL1	0	0	INT	rs1056854
19	41308052	0.89	0.99	0	rs4456618	G	C	0.28	0.22	0.33	0.18	0	0	E003,6_EnhG;E012,7_Enh;E019,6_EnhG;E022,7_Enh;E029,7_Enh;E030,2_TssAFlnk;E031,2_TssAFlnk;E032,6_EnhG;E033,2_TssAFlnk;E034,2_TssAFlnk;E035,7_Enh;E036,3_TxFlnk;E037,2_TssAFlnk;E038,2_TssAFlnk;E039,2_TssAFlnk;E040,2_TssAFlnk;E041,2_TssAFlnk;E042,2_TssAFlnk;E043,2_TssAFlnk;E044,2_TssAFlnk;E045,2_TssAFlnk;E046,6_EnhG;E047,2_TssAFlnk;E048,2_TssAFlnk;E049,6_EnhG;E050,2_TssAFlnk;E051,2_TssAFlnk;E056,3_Tx…	E001,11_TxEnh3;E002,11_TxEnh3;E003,11_TxEnh3;E005,11_TxEnh3;E006,11_TxEnh3;E007,11_TxEnh3;E008,11_TxEnh3;E009,11_TxEnh3;E010,11_TxEnh3;E011,11_TxEnh3;E012,13_EnhA1;E013,11_TxEnh3;E014,11_TxEnh3;E015,11_TxEnh3;E016,11_TxEnh3;E017,11_TxEnh3;E018,11_TxEnh3;E019,11_TxEnh3;E020,11_TxEnh3;E021,11_TxEnh3;E022,11_TxEnh3;E023,11_TxEnh3;E024,11_TxEnh3;E025,11_TxEnh3;E026,11_TxEnh3;E027,11_TxEnh3;E028,11_Tx…	E001,H3K4me1_Enh;E003,H3K4me1_Enh;E006,H3K4me1_Enh;E009,H3K4me1_Enh;E010,H3K4me1_Enh;E011,H3K4me1_Enh;E012,H3K4me1_Enh;E013,H3K4me1_Enh;E014,H3K4me1_Enh;E016,H3K4me1_Enh;E017,H3K4me1_Enh;E018,H3K4me1_Enh;E019,H3K4me1_Enh;E020,H3K4me1_Enh;E021,H3K4me1_Enh;E022,H3K4me1_Enh;E023,H3K4me1_Enh;E024,H3K4me1_Enh;E025,H3K4me1_Enh;E026,H3K4me1_Enh;E027,H3K4me1_Enh;E028,H3K4me1_Enh;E029,H3K4me1_Enh;E030,H3K…	E007;E029;E032;E033;E034;E046;E050;E051;E055;E059;E089;E090;E093;E100;E118;E121;E122	A549,POL2,HudsonAlpha,DEX_100nM;A549,POL2,HudsonAlpha,EtOH_0.02pct;GM12878,POL2,HudsonAlpha,None;K562,POL2,UT-A,None	GTEx2015_v6,Adrenal_Gland,TGFB1,1.08511207758086e-09;GTEx2015_v6,Artery_Tibial,AXL,1.97469912490535e-07;Lappalainen2013,Lymphoblastoid_EUR_exonlevel,ENSG00000105323.10_41809877_41810166,6.17665715066869e-07;Westra2013,Whole_Blood,BCKDHA,4.053130256588129E-4;Westra2013,Whole_Blood,CCDC97,4.3187232165037146E-4;Westra2013,Whole_Blood,HNRNPUL1,1.0574516542862502E-15	.	.	Mtf1_1;Mtf1_2;Zfx	ENSG00000105323.11	HNRNPUL1	3	145	NM_007040	HNRNPUL1	3	145	.	rs1056854
19	41308507	0.89	0.99	0	rs1865053	T	C	0.33	0.23	0.33	0.18	0	0	E001,7_Enh;E003,7_Enh;E005,6_EnhG;E006,7_Enh;E009,6_EnhG;E010,6_EnhG;E011,6_EnhG;E012,7_Enh;E013,7_Enh;E014,7_Enh;E015,6_EnhG;E016,7_Enh;E017,6_EnhG;E018,7_Enh;E019,7_Enh;E020,6_EnhG;E021,7_Enh;E023,7_Enh;E024,7_Enh;E025,2_TssAFlnk;E026,7_Enh;E027,6_EnhG;E029,7_Enh;E030,7_Enh;E031,2_TssAFlnk;E032,7_Enh;E033,2_TssAFlnk;E034,2_TssAFlnk;E035,7_Enh;E036,6_EnhG;E037,2_TssAFlnk;E038,2_TssAFlnk;E039,2_T…	E001,13_EnhA1;E002,15_EnhAF;E003,15_EnhAF;E004,13_EnhA1;E005,13_EnhA1;E006,13_EnhA1;E007,15_EnhAF;E008,15_EnhAF;E009,15_EnhAF;E010,15_EnhAF;E011,13_EnhA1;E012,13_EnhA1;E013,13_EnhA1;E014,13_EnhA1;E015,13_EnhA1;E016,13_EnhA1;E017,13_EnhA1;E018,13_EnhA1;E019,13_EnhA1;E020,13_EnhA1;E021,15_EnhAF;E022,13_EnhA1;E023,13_EnhA1;E024,14_EnhA2;E025,13_EnhA1;E026,13_EnhA1;E027,13_EnhA1;E028,13_EnhA1;E029,13…	E001,H3K4me1_Enh;E002,H3K4me1_Enh;E003,H3K4me1_Enh;E004,H3K4me1_Enh;E005,H3K4me1_Enh;E006,H3K4me1_Enh;E009,H3K4me1_Enh;E010,H3K4me1_Enh;E011,H3K4me1_Enh;E012,H3K4me1_Enh;E013,H3K4me1_Enh;E014,H3K4me1_Enh;E015,H3K4me1_Enh;E016,H3K4me1_Enh;E017,H3K4me1_Enh;E018,H3K4me1_Enh;E019,H3K4me1_Enh;E020,H3K4me1_Enh;E021,H3K4me1_Enh;E022,H3K4me1_Enh;E023,H3K4me1_Enh;E024,H3K4me1_Enh;E025,H3K4me1_Enh;E026,H3K…	E003;E004;E006;E007;E008;E028;E029;E032;E033;E034;E046;E050;E055;E057;E059;E083;E085;E089;E090;E091;E092;E093;E100;E109;E114;E116;E117;E118;E119;E120;E121;E122;E123;E124	GM12878,ELF1,HudsonAlpha,None;GM18505,POL2,Stanford,None;H1-hESC,POL2,HudsonAlpha,None;H1-hESC,POL2,HudsonAlpha,None;HeLa-S3,CTCF,Broad,None;HepG2,POL2,UT-A,None;K562,POL2,Stanford,IFNa30;Osteobl,CTCF,Broad,None	GTEx2015_v6,Adrenal_Gland,TGFB1,2.23835786701898e-10;GTEx2015_v6,Artery_Tibial,AXL,3.76363427198132e-07;Lappalainen2013,Lymphoblastoid_EUR_exonlevel,ENSG00000105323.10_41809877_41810166,6.58263209457873e-07	.	.	MZF1::1-4_2	ENSG00000105323.11	HNRNPUL1	3	600	NM_007040	HNRNPUL1	3	600	.	rs1056854
19	41309808	0.91	0.99	0	rs12984160	A	G	0.06	0.17	0.27	0.17	0	0	E001,1_TssA;E002,1_TssA;E003,1_TssA;E005,1_TssA;E006,1_TssA;E008,1_TssA;E009,1_TssA;E010,2_TssAFlnk;E011,1_TssA;E012,1_TssA;E013,1_TssA;E014,1_TssA;E015,1_TssA;E016,1_TssA;E017,1_TssA;E018,1_TssA;E019,1_TssA;E020,1_TssA;E021,1_TssA;E022,2_TssAFlnk;E023,1_TssA;E024,1_TssA;E025,1_TssA;E026,1_TssA;E027,1_TssA;E028,1_TssA;E029,2_TssAFlnk;E030,2_TssAFlnk;E031,2_TssAFlnk;E032,1_TssA;E033,2_TssAFlnk;E03…	E001,1_TssA;E002,2_PromU;E003,1_TssA;E004,2_PromU;E005,1_TssA;E006,3_PromD1;E007,2_PromU;E008,1_TssA;E009,3_PromD1;E010,2_PromU;E011,1_TssA;E012,3_PromD1;E013,3_PromD1;E014,1_TssA;E015,2_PromU;E016,1_TssA;E017,3_PromD1;E018,1_TssA;E019,1_TssA;E020,1_TssA;E021,1_TssA;E022,1_TssA;E023,3_PromD1;E024,1_TssA;E025,3_PromD1;E026,3_PromD1;E027,3_PromD1;E028,2_PromU;E029,3_PromD1;E030,3_PromD1;E031,3_Prom…	E001,H3K4me3_Pro;E002,H3K4me3_Pro;E003,H3K4me3_Pro;E004,H3K4me3_Pro;E005,H3K4me3_Pro;E006,H3K4me3_Pro;E007,H3K4me3_Pro;E008,H3K4me3_Pro;E009,H3K4me3_Pro;E010,H3K4me3_Pro;E011,H3K4me3_Pro;E012,H3K4me3_Pro;E013,H3K4me3_Pro;E014,H3K4me3_Pro;E015,H3K4me3_Pro;E016,H3K4me3_Pro;E017,H3K4me3_Pro;E018,H3K4me3_Pro;E019,H3K4me3_Pro;E020,H3K4me3_Pro;E021,H3K4me3_Pro;E022,H3K4me3_Pro;E023,H3K4me3_Pro;E024,H3K…	E004;E006;E017;E028;E032;E033;E034;E046;E056;E057;E059;E081;E082;E083;E086;E088;E089;E090;E091;E093;E109;E114;E116;E117;E121;E122;E123;E124;E126;E127;E128	.	GTEx2015_v6,Adrenal_Gland,TGFB1,4.37782668225947e-08;Lappalainen2013,Lymphoblastoid_EUR_exonlevel,ENSG00000105323.10_41809877_41810166,5.11701694604294e-07;Westra2013,Whole_Blood,BCKDHA,4.053130256588129E-4;Westra2013,Whole_Blood,CCDC97,4.328502668421682E-4;Westra2013,Whole_Blood,HNRNPUL1,9.574012947924883E-16	.	.	.	ENSG00000142039.2	CCDC97	5	380	NM_052848	CCDC97	5	379	.	rs1056854
19	41313919	0.87	0.98	0	rs34945449	T	C	0.31	0.23	0.32	0.18	0	0	E037,6_EnhG		E005,H3K4me3_Pro;E009,H3K4me3_Pro;E049,H3K4me3_Pro;E056,H3K4me3_Pro;E058,H3K4me3_Pro;E059,H3K4me3_Pro;E075,H3K4me3_Pro;E111,H3K4me3_Pro;E113,H3K4me3_Pro;E125,H3K4me3_Pro;E006,H3K4me1_Enh;E027,H3K4me1_Enh;E032,H3K4me1_Enh;E034,H3K4me1_Enh;E037,H3K4me1_Enh;E038,H3K4me1_Enh;E039,H3K4me1_Enh;E040,H3K4me1_Enh;E041,H3K4me1_Enh;E042,H3K4me1_Enh;E043,H3K4me1_Enh;E044,H3K4me1_Enh;E045,H3K4me1_Enh;E046,H3K…		.	GTEx2015_v6,Adrenal_Gland,TGFB1,1.71412190042608e-10;GTEx2015_v6,Artery_Tibial,AXL,3.97711038431684e-07;Lappalainen2013,Lymphoblastoid_EUR_exonlevel,ENSG00000105323.10_41809877_41810166,8.21692037375991e-07	.	.	GCNF	ENSG00000142039.2	CCDC97	0	0	NM_052848	CCDC97	0	0	INT	rs1056854
19	41317262	0.87	0.98	0	rs8109167	G	T	0.31	0.23	0.34	0.18	0	0			E013,H3K27ac_Enh;E020,H3K27ac_Enh;E039,H3K27ac_Enh;E041,H3K27ac_Enh;E044,H3K27ac_Enh;E046,H3K27ac_Enh;E049,H3K27ac_Enh;E050,H3K27ac_Enh;E055,H3K27ac_Enh;E056,H3K27ac_Enh;E113,H3K27ac_Enh;E124,H3K27ac_Enh;E129,H3K27ac_Enh;E034,H3K4me1_Enh;E037,H3K4me1_Enh;E041,H3K4me1_Enh;E042,H3K4me1_Enh;E044,H3K4me1_Enh;E048,H3K4me1_Enh;E124,H3K4me1_Enh;E038,H3K9ac_Pro;E049,H3K9ac_Pro;E063,H3K9ac_Pro;E075,H3K9ac…	E032;E033;E034;E088	.	GTEx2015_v6,Adrenal_Gland,TGFB1,2.59706014490834e-10;GTEx2015_v6,Artery_Tibial,AXL,3.43688488380737e-07;Lappalainen2013,Lymphoblastoid_EUR_exonlevel,ENSG00000105323.10_41809877_41810166,8.32683242938865e-07;Westra2013,Whole_Blood,BCKDHA,2.087377663442192E-4;Westra2013,Whole_Blood,CCDC97,3.012764365061221E-4;Westra2013,Whole_Blood,HNRNPUL1,6.905461057882706E-15	.	19222302,Gene expression of HNRPUL1 [probe 3834089] in peripheral blood mononuclear cells,4.39E-04	.	ENSG00000142039.2	CCDC97	0	0	NM_052848	CCDC97	0	0	INT	rs1056854
19	41317592	0.88	0.98	0	rs35501756	G	A	0.07	0.17	0.27	0.17	0	0			E013,H3K27ac_Enh;E020,H3K27ac_Enh;E039,H3K27ac_Enh;E041,H3K27ac_Enh;E043,H3K27ac_Enh;E044,H3K27ac_Enh;E046,H3K27ac_Enh;E049,H3K27ac_Enh;E050,H3K27ac_Enh;E055,H3K27ac_Enh;E113,H3K27ac_Enh;E124,H3K27ac_Enh;E129,H3K27ac_Enh;E034,H3K4me1_Enh;E037,H3K4me1_Enh;E041,H3K4me1_Enh;E044,H3K4me1_Enh;E048,H3K4me1_Enh;E110,H3K4me1_Enh;E124,H3K4me1_Enh;E038,H3K9ac_Pro;E063,H3K9ac_Pro;E075,H3K9ac_Pro;E111,H3K9ac…		.	GTEx2015_v6,Adrenal_Gland,TGFB1,4.37433247475852e-08;Lappalainen2013,Lymphoblastoid_EUR_exonlevel,ENSG00000105323.10_41809877_41810166,4.9719058207355e-07	.	.	Mxi1_disc1	ENSG00000142039.2	CCDC97	0	0	NM_052848	CCDC97	0	0	INT	rs1056854
19	41318274	0.87	0.98	0	rs34322801	C	G	0.07	0.17	0.27	0.18	0	0			E004,H3K27ac_Enh;E005,H3K27ac_Enh;E013,H3K27ac_Enh;E020,H3K27ac_Enh;E039,H3K27ac_Enh;E041,H3K27ac_Enh;E043,H3K27ac_Enh;E044,H3K27ac_Enh;E050,H3K27ac_Enh;E056,H3K27ac_Enh;E059,H3K27ac_Enh;E071,H3K27ac_Enh;E074,H3K27ac_Enh;E091,H3K27ac_Enh;E099,H3K27ac_Enh;E111,H3K27ac_Enh;E113,H3K27ac_Enh;E124,H3K27ac_Enh;E125,H3K27ac_Enh;E129,H3K27ac_Enh;E007,H3K4me3_Pro;E055,H3K4me3_Pro;E034,H3K4me1_Enh;E037,H3K…		.	GTEx2015_v6,Adrenal_Gland,TGFB1,1.84298937231784e-07;Lappalainen2013,Lymphoblastoid_EUR_exonlevel,ENSG00000105323.10_41809877_41810166,3.56890799486267e-07	.	.	SZF1-1	ENSG00000142039.2	CCDC97	0	0	NM_052848	CCDC97	0	0	INT	rs1056854
19	41318562	0.87	0.98	0	rs1865052	G	A	0.27	0.22	0.34	0.18	0	0	E055,6_EnhG;E056,3_TxFlnk;E079,6_EnhG;E091,6_EnhG	E056,10_TxEnh5	E004,H3K27ac_Enh;E005,H3K27ac_Enh;E013,H3K27ac_Enh;E015,H3K27ac_Enh;E020,H3K27ac_Enh;E022,H3K27ac_Enh;E039,H3K27ac_Enh;E041,H3K27ac_Enh;E043,H3K27ac_Enh;E044,H3K27ac_Enh;E050,H3K27ac_Enh;E055,H3K27ac_Enh;E056,H3K27ac_Enh;E059,H3K27ac_Enh;E069,H3K27ac_Enh;E071,H3K27ac_Enh;E073,H3K27ac_Enh;E074,H3K27ac_Enh;E091,H3K27ac_Enh;E096,H3K27ac_Enh;E099,H3K27ac_Enh;E105,H3K27ac_Enh;E111,H3K27ac_Enh;E112,H3K…	E004;E034;E046;E100;E114;E116;E127	.	GTEx2015_v6,Adrenal_Gland,TGFB1,1.08385417071809e-09;GTEx2015_v6,Artery_Tibial,AXL,1.88771579320345e-07;Lappalainen2013,Lymphoblastoid_EUR_exonlevel,ENSG00000105323.10_41809877_41810166,7.57762057982157e-07	.	.	CTCF_disc5;CTCF_disc9;NRSF_disc1;NRSF_known1;NRSF_known3;Rad21_disc8;Sin3Ak-20_disc1	ENSG00000142039.2	CCDC97	0	0	NM_052848	CCDC97	0	0	INT	rs1056854
19	41318980	0.87	0.98	0	rs1865051	T	C	0.45	0.23	0.34	0.18	0	0	E005,6_EnhG;E006,6_EnhG;E022,6_EnhG;E055,6_EnhG;E056,3_TxFlnk;E059,6_EnhG;E079,6_EnhG;E091,6_EnhG;E113,6_EnhG	E055,12_TxEnhW;E056,10_TxEnh5;E091,10_TxEnh5	E004,H3K27ac_Enh;E005,H3K27ac_Enh;E013,H3K27ac_Enh;E015,H3K27ac_Enh;E020,H3K27ac_Enh;E022,H3K27ac_Enh;E029,H3K27ac_Enh;E041,H3K27ac_Enh;E043,H3K27ac_Enh;E044,H3K27ac_Enh;E045,H3K27ac_Enh;E050,H3K27ac_Enh;E055,H3K27ac_Enh;E056,H3K27ac_Enh;E059,H3K27ac_Enh;E069,H3K27ac_Enh;E071,H3K27ac_Enh;E072,H3K27ac_Enh;E073,H3K27ac_Enh;E074,H3K27ac_Enh;E091,H3K27ac_Enh;E095,H3K27ac_Enh;E096,H3K27ac_Enh;E099,H3K…	E028;E029;E034;E046;E116;E127	A549,POL2,HudsonAlpha,EtOH_0.02pct;GM12878,POL2,HudsonAlpha,None	GTEx2015_v6,Adrenal_Gland,TGFB1,1.64908773819101e-07;GTEx2015_v6,Artery_Tibial,AXL,4.0098503181758e-08;GTEx2015_v6,Cells_Transformed_fibroblasts,AXL,1.55044906698533e-05;GTEx2015_v6,Lung,AXL,7.4376601657678e-07;Lappalainen2013,Lymphoblastoid_EUR_exonlevel,ENSG00000105323.10_41809877_41810166,8.50548165520224e-07;Westra2013,Whole_Blood,BCKDHA,3.8231486045084076E-4;Westra2013,Whole_Blood,CCDC97,4.3…	.	.	HDAC2_disc3	ENSG00000142039.2	CCDC97	0	0	NM_052848	CCDC97	0	0	INT	rs1056854
19	41319076	0.87	0.98	0	rs16958994	T	C	0.3	0.23	0.34	0.18	0	0	E005,6_EnhG;E006,6_EnhG;E022,6_EnhG;E055,6_EnhG;E056,3_TxFlnk;E059,6_EnhG;E079,6_EnhG;E091,6_EnhG;E113,6_EnhG	E055,12_TxEnhW;E056,10_TxEnh5;E091,10_TxEnh5	E004,H3K27ac_Enh;E005,H3K27ac_Enh;E013,H3K27ac_Enh;E015,H3K27ac_Enh;E020,H3K27ac_Enh;E022,H3K27ac_Enh;E029,H3K27ac_Enh;E041,H3K27ac_Enh;E043,H3K27ac_Enh;E044,H3K27ac_Enh;E045,H3K27ac_Enh;E050,H3K27ac_Enh;E055,H3K27ac_Enh;E056,H3K27ac_Enh;E059,H3K27ac_Enh;E069,H3K27ac_Enh;E071,H3K27ac_Enh;E072,H3K27ac_Enh;E073,H3K27ac_Enh;E074,H3K27ac_Enh;E091,H3K27ac_Enh;E095,H3K27ac_Enh;E096,H3K27ac_Enh;E099,H3K…	E034;E046;E091;E097;E114;E116;E124;E125;E127	A549,POL2,HudsonAlpha,EtOH_0.02pct;GM12878,POL2,HudsonAlpha,None;GM12878,POL24H8,HudsonAlpha,None	GTEx2015_v6,Adrenal_Gland,TGFB1,2.58811885723527e-10;GTEx2015_v6,Artery_Tibial,AXL,3.54828495084091e-07;Lappalainen2013,Lymphoblastoid_EUR_exonlevel,ENSG00000105323.10_41809877_41810166,9.47583690508174e-07	.	.	COMP1;Mtf1_2	ENSG00000142039.2	CCDC97	0	0	NM_052848	CCDC97	0	0	INT	rs1056854
19	41319233	0.87	0.98	0	rs16958996	C	T	0.28	0.24	0.34	0.18	0	0	E005,6_EnhG;E006,6_EnhG;E022,6_EnhG;E055,6_EnhG;E056,3_TxFlnk;E059,6_EnhG;E091,6_EnhG;E105,6_EnhG;E113,6_EnhG	E055,12_TxEnhW;E056,10_TxEnh5;E091,10_TxEnh5	E004,H3K27ac_Enh;E005,H3K27ac_Enh;E013,H3K27ac_Enh;E015,H3K27ac_Enh;E020,H3K27ac_Enh;E022,H3K27ac_Enh;E029,H3K27ac_Enh;E041,H3K27ac_Enh;E043,H3K27ac_Enh;E044,H3K27ac_Enh;E045,H3K27ac_Enh;E050,H3K27ac_Enh;E055,H3K27ac_Enh;E056,H3K27ac_Enh;E059,H3K27ac_Enh;E069,H3K27ac_Enh;E071,H3K27ac_Enh;E072,H3K27ac_Enh;E073,H3K27ac_Enh;E074,H3K27ac_Enh;E091,H3K27ac_Enh;E095,H3K27ac_Enh;E096,H3K27ac_Enh;E098,H3K…	E034;E091;E114;E116;E127	GM12878,BCL3,HudsonAlpha,None;HUVEC,POL2,UT-A,None	GTEx2015_v6,Adrenal_Gland,TGFB1,3.30984183162522e-09;GTEx2015_v6,Artery_Tibial,AXL,1.8126805396933e-07;Lappalainen2013,Lymphoblastoid_EUR_exonlevel,ENSG00000105323.10_41809877_41810166,8.33575521055692e-07	.	.	CAC-binding-protein;SP1_disc3;Zfx	ENSG00000142039.2	CCDC97	0	0	NM_052848	CCDC97	0	0	INT	rs1056854
19	41319253	0.86	0.98	0	rs67511749	A	G	0.27	0.23	0.34	0.18	0	0	E005,6_EnhG;E006,6_EnhG;E022,6_EnhG;E055,6_EnhG;E056,3_TxFlnk;E059,6_EnhG;E091,6_EnhG;E105,6_EnhG;E113,6_EnhG	E055,12_TxEnhW;E056,10_TxEnh5;E091,10_TxEnh5	E004,H3K27ac_Enh;E005,H3K27ac_Enh;E013,H3K27ac_Enh;E015,H3K27ac_Enh;E020,H3K27ac_Enh;E022,H3K27ac_Enh;E029,H3K27ac_Enh;E041,H3K27ac_Enh;E043,H3K27ac_Enh;E044,H3K27ac_Enh;E045,H3K27ac_Enh;E050,H3K27ac_Enh;E055,H3K27ac_Enh;E056,H3K27ac_Enh;E059,H3K27ac_Enh;E069,H3K27ac_Enh;E071,H3K27ac_Enh;E072,H3K27ac_Enh;E073,H3K27ac_Enh;E074,H3K27ac_Enh;E091,H3K27ac_Enh;E095,H3K27ac_Enh;E096,H3K27ac_Enh;E098,H3K…	E034;E091;E114;E116;E127	GM12878,BCL3,HudsonAlpha,None;GM12891,POL2,HudsonAlpha,None;HUVEC,POL2,UT-A,None	GTEx2015_v6,Adrenal_Gland,TGFB1,6.52771613069699e-10;GTEx2015_v6,Artery_Tibial,AXL,1.85493876352415e-07;GTEx2015_v6,Lung,AXL,1.07033932059149e-05;Lappalainen2013,Lymphoblastoid_EUR_exonlevel,ENSG00000105323.10_41809877_41810166,4.02590052485979e-07	.	.	BHLHE40_disc1;Hic1_2;Nkx2_2;Roaz_1;ZEB1_known5	ENSG00000142039.2	CCDC97	0	0	NM_052848	CCDC97	0	0	INT	rs1056854
19	41319281	0.87	0.98	0	rs16958999	A	G	0.28	0.23	0.34	0.18	0	0	E005,6_EnhG;E006,6_EnhG;E022,6_EnhG;E055,6_EnhG;E056,3_TxFlnk;E059,6_EnhG;E091,6_EnhG;E105,6_EnhG;E113,6_EnhG	E055,12_TxEnhW;E056,10_TxEnh5;E091,10_TxEnh5	E004,H3K27ac_Enh;E005,H3K27ac_Enh;E013,H3K27ac_Enh;E015,H3K27ac_Enh;E020,H3K27ac_Enh;E022,H3K27ac_Enh;E029,H3K27ac_Enh;E041,H3K27ac_Enh;E043,H3K27ac_Enh;E044,H3K27ac_Enh;E045,H3K27ac_Enh;E050,H3K27ac_Enh;E055,H3K27ac_Enh;E056,H3K27ac_Enh;E059,H3K27ac_Enh;E069,H3K27ac_Enh;E071,H3K27ac_Enh;E072,H3K27ac_Enh;E073,H3K27ac_Enh;E074,H3K27ac_Enh;E091,H3K27ac_Enh;E095,H3K27ac_Enh;E096,H3K27ac_Enh;E098,H3K…	E006;E034;E091;E098;E116;E127	GM12878,BCL3,HudsonAlpha,None;GM12891,POL2,HudsonAlpha,None	GTEx2015_v6,Adrenal_Gland,TGFB1,9.50180589390546e-10;GTEx2015_v6,Artery_Tibial,AXL,1.85222417540504e-07;GTEx2015_v6,Lung,AXL,1.06973657133778e-05;Lappalainen2013,Lymphoblastoid_EUR_exonlevel,ENSG00000105323.10_41809877_41810166,9.36183921512574e-07	.	.	AP-1_disc1;Arnt_1;Arnt_2;BHLHE40_disc1;BHLHE40_known1;BHLHE40_known2;GCNF;HNF4_known4;Mxi1_known1;Myc_known3;NR4A_known1;RAR;RXRA_known3;SIRT6_disc1;SMC3_disc1;TATA_disc2;TFE	ENSG00000142039.2	CCDC97	0	0	NM_052848	CCDC97	0	0	INT	rs1056854
19	41319871	0.87	0.98	0	rs3826714	A	G	0.28	0.22	0.34	0.18	0	0	E005,6_EnhG;E006,6_EnhG;E013,6_EnhG;E022,6_EnhG;E024,6_EnhG;E055,3_TxFlnk;E056,3_TxFlnk;E058,6_EnhG;E059,6_EnhG;E061,6_EnhG;E080,6_EnhG;E091,6_EnhG;E105,6_EnhG;E113,6_EnhG	E005,11_TxEnh3;E007,11_TxEnh3;E012,11_TxEnh3;E013,10_TxEnh5;E022,11_TxEnh3;E024,10_TxEnh5;E055,10_TxEnh5;E056,10_TxEnh5;E091,10_TxEnh5;E095,11_TxEnh3;E113,10_TxEnh5	E001,H3K4me1_Enh;E003,H3K4me1_Enh;E005,H3K4me1_Enh;E006,H3K4me1_Enh;E009,H3K4me1_Enh;E011,H3K4me1_Enh;E013,H3K4me1_Enh;E014,H3K4me1_Enh;E015,H3K4me1_Enh;E016,H3K4me1_Enh;E017,H3K4me1_Enh;E018,H3K4me1_Enh;E020,H3K4me1_Enh;E021,H3K4me1_Enh;E022,H3K4me1_Enh;E024,H3K4me1_Enh;E028,H3K4me1_Enh;E034,H3K4me1_Enh;E036,H3K4me1_Enh;E041,H3K4me1_Enh;E042,H3K4me1_Enh;E043,H3K4me1_Enh;E046,H3K4me1_Enh;E047,H3K…	E029	GM12892,POL24H8,HudsonAlpha,None;GM12892,POL24H8,HudsonAlpha,None;K562,POL2,UT-A,None	GTEx2015_v6,Adrenal_Gland,TGFB1,1.13328468155181e-09;GTEx2015_v6,Artery_Tibial,AXL,1.86252341923372e-07;Lappalainen2013,Lymphoblastoid_EUR_exonlevel,ENSG00000105323.10_41809877_41810166,8.59887594225055e-07;Westra2013,Whole_Blood,BCKDHA,3.814440049081614E-4;Westra2013,Whole_Blood,CCDC97,4.42744075970579E-4;Westra2013,Whole_Blood,HNRNPUL1,9.297028795012427E-16	.	.	ELF1_known1;NRSF_known3;Rad21_disc7;ZBTB33_known1	ENSG00000142039.2	CCDC97	0	0	NM_052848	CCDC97	0	0	INT	rs1056854
19	41320693	0.83	0.96	0	rs34075897	A	G	0.31	0.23	0.34	0.18	0	0	E005,6_EnhG;E006,6_EnhG;E013,6_EnhG;E022,6_EnhG;E036,6_EnhG;E049,6_EnhG;E051,6_EnhG;E055,3_TxFlnk;E056,3_TxFlnk;E059,6_EnhG;E061,6_EnhG;E079,6_EnhG;E080,6_EnhG;E091,6_EnhG;E095,6_EnhG;E105,6_EnhG;E113,6_EnhG;E114,6_EnhG;E118,6_EnhG;E120,6_EnhG	E007,11_TxEnh3;E012,11_TxEnh3;E015,11_TxEnh3;E021,11_TxEnh3;E022,11_TxEnh3;E055,12_TxEnhW;E056,10_TxEnh5;E095,11_TxEnh3;E105,10_TxEnh5;E113,12_TxEnhW	E001,H3K4me1_Enh;E003,H3K4me1_Enh;E005,H3K4me1_Enh;E006,H3K4me1_Enh;E009,H3K4me1_Enh;E011,H3K4me1_Enh;E012,H3K4me1_Enh;E013,H3K4me1_Enh;E014,H3K4me1_Enh;E015,H3K4me1_Enh;E016,H3K4me1_Enh;E017,H3K4me1_Enh;E018,H3K4me1_Enh;E020,H3K4me1_Enh;E021,H3K4me1_Enh;E022,H3K4me1_Enh;E024,H3K4me1_Enh;E028,H3K4me1_Enh;E032,H3K4me1_Enh;E034,H3K4me1_Enh;E035,H3K4me1_Enh;E036,H3K4me1_Enh;E037,H3K4me1_Enh;E038,H3K…	E029;E032;E033;E091;E114	.	GTEx2015_v6,Adrenal_Gland,TGFB1,2.58074483153364e-10;GTEx2015_v6,Artery_Tibial,AXL,3.76236457689064e-07;Lappalainen2013,Lymphoblastoid_EUR_exonlevel,ENSG00000105323.10_41809877_41810166,9.24207861807958e-07	.	.	CACD_2;INSM1;Myf_3;PRDM1_known1;Pbx3_disc2	ENSG00000142039.2	CCDC97	0	0	NM_052848	CCDC97	0	0	INT	rs1056854
19	41321215	0.83	0.96	0	rs7257310	C	T	0.27	0.22	0.34	0.18	0	0	E005,6_EnhG;E006,6_EnhG;E013,6_EnhG;E015,6_EnhG;E017,6_EnhG;E022,6_EnhG;E034,6_EnhG;E035,6_EnhG;E036,6_EnhG;E046,6_EnhG;E049,6_EnhG;E050,6_EnhG;E051,6_EnhG;E055,6_EnhG;E056,3_TxFlnk;E059,6_EnhG;E061,7_Enh;E079,6_EnhG;E080,6_EnhG;E089,6_EnhG;E090,6_EnhG;E091,6_EnhG;E095,6_EnhG;E105,6_EnhG;E107,6_EnhG;E113,6_EnhG;E114,6_EnhG;E118,6_EnhG;E120,6_EnhG;E121,7_Enh;E125,6_EnhG;E128,6_EnhG	E001,11_TxEnh3;E004,11_TxEnh3;E005,10_TxEnh5;E006,10_TxEnh5;E007,11_TxEnh3;E008,11_TxEnh3;E012,11_TxEnh3;E013,10_TxEnh5;E015,11_TxEnh3;E016,11_TxEnh3;E017,10_TxEnh5;E018,11_TxEnh3;E021,11_TxEnh3;E022,11_TxEnh3;E023,11_TxEnh3;E025,11_TxEnh3;E026,10_TxEnh5;E031,11_TxEnh3;E033,11_TxEnh3;E034,10_TxEnh5;E035,11_TxEnh3;E036,10_TxEnh5;E043,12_TxEnhW;E046,10_TxEnh5;E049,10_TxEnh5;E050,10_TxEnh5;E051,9_Tx…	E001,H3K4me1_Enh;E002,H3K4me1_Enh;E003,H3K4me1_Enh;E005,H3K4me1_Enh;E006,H3K4me1_Enh;E008,H3K4me1_Enh;E009,H3K4me1_Enh;E011,H3K4me1_Enh;E012,H3K4me1_Enh;E013,H3K4me1_Enh;E014,H3K4me1_Enh;E015,H3K4me1_Enh;E016,H3K4me1_Enh;E017,H3K4me1_Enh;E018,H3K4me1_Enh;E020,H3K4me1_Enh;E021,H3K4me1_Enh;E022,H3K4me1_Enh;E024,H3K4me1_Enh;E026,H3K4me1_Enh;E027,H3K4me1_Enh;E028,H3K4me1_Enh;E032,H3K4me1_Enh;E034,H3K…	E021;E032;E033;E034;E093;E097;E114	GM12878,POL2,HudsonAlpha,None	GTEx2015_v6,Adrenal_Gland,TGFB1,1.08230089009318e-09;GTEx2015_v6,Artery_Tibial,AXL,2.00837486077329e-07;Lappalainen2013,Lymphoblastoid_EUR_exonlevel,ENSG00000105323.10_41809877_41810166,8.97772893716181e-07	.	.	PU.1_disc3;ZNF263_disc1	ENSG00000142039.2	CCDC97	0	0	NM_052848	CCDC97	0	0	INT	rs1056854
19	41321447	0.83	0.96	0	rs7257742	G	T	0.27	0.22	0.34	0.18	0	0	E001,7_Enh;E003,7_Enh;E005,6_EnhG;E006,6_EnhG;E009,6_EnhG;E013,6_EnhG;E015,6_EnhG;E017,6_EnhG;E022,6_EnhG;E024,6_EnhG;E025,6_EnhG;E026,6_EnhG;E027,6_EnhG;E034,6_EnhG;E035,6_EnhG;E036,6_EnhG;E046,6_EnhG;E049,6_EnhG;E050,6_EnhG;E051,6_EnhG;E052,6_EnhG;E053,6_EnhG;E055,3_TxFlnk;E056,3_TxFlnk;E059,6_EnhG;E061,7_Enh;E063,6_EnhG;E075,6_EnhG;E077,6_EnhG;E079,6_EnhG;E080,6_EnhG;E083,7_Enh;E089,6_EnhG;E09…	E001,17_EnhW2;E002,17_EnhW2;E003,17_EnhW2;E004,11_TxEnh3;E005,9_TxReg;E006,9_TxReg;E007,11_TxEnh3;E008,11_TxEnh3;E010,11_TxEnh3;E011,10_TxEnh5;E012,11_TxEnh3;E013,10_TxEnh5;E014,17_EnhW2;E015,15_EnhAF;E016,17_EnhW2;E017,10_TxEnh5;E018,11_TxEnh3;E019,11_TxEnh3;E020,11_TxEnh3;E021,17_EnhW2;E022,11_TxEnh3;E023,11_TxEnh3;E024,17_EnhW2;E025,11_TxEnh3;E026,10_TxEnh5;E027,11_TxEnh3;E028,11_TxEnh3;E029,1…	E001,H3K4me1_Enh;E002,H3K4me1_Enh;E003,H3K4me1_Enh;E004,H3K4me1_Enh;E005,H3K4me1_Enh;E006,H3K4me1_Enh;E007,H3K4me1_Enh;E008,H3K4me1_Enh;E009,H3K4me1_Enh;E010,H3K4me1_Enh;E011,H3K4me1_Enh;E012,H3K4me1_Enh;E013,H3K4me1_Enh;E014,H3K4me1_Enh;E015,H3K4me1_Enh;E016,H3K4me1_Enh;E017,H3K4me1_Enh;E018,H3K4me1_Enh;E019,H3K4me1_Enh;E020,H3K4me1_Enh;E021,H3K4me1_Enh;E022,H3K4me1_Enh;E023,H3K4me1_Enh;E024,H3K…	E033;E092;E100	A549,POL2,HudsonAlpha,EtOH_0.02pct;GM12878,POL2,HudsonAlpha,None	GTEx2015_v6,Adrenal_Gland,TGFB1,1.08166460508366e-09;GTEx2015_v6,Artery_Tibial,AXL,2.0113229891894e-07;Lappalainen2013,Lymphoblastoid_EUR_exonlevel,ENSG00000105323.10_41809877_41810166,8.01381586641811e-07	.	.	Pax-5_known1	ENSG00000142039.2	CCDC97	0	0	NM_052848	CCDC97	0	0	INT	rs1056854
19	41323404	0.85	0.96	0	rs2241720	C	G	0.09	0.17	0.27	0.17	0	0	E001,7_Enh;E002,7_Enh;E003,7_Enh;E004,7_Enh;E005,7_Enh;E006,7_Enh;E007,7_Enh;E009,6_EnhG;E010,7_Enh;E011,7_Enh;E012,7_Enh;E013,2_TssAFlnk;E014,7_Enh;E015,2_TssAFlnk;E016,7_Enh;E017,2_TssAFlnk;E018,7_Enh;E019,7_Enh;E020,7_Enh;E021,7_Enh;E022,7_Enh;E023,2_TssAFlnk;E024,6_EnhG;E025,2_TssAFlnk;E026,2_TssAFlnk;E029,6_EnhG;E030,7_Enh;E031,7_Enh;E032,6_EnhG;E034,6_EnhG;E035,7_Enh;E036,3_TxFlnk;E041,6_En…	E001,13_EnhA1;E002,15_EnhAF;E003,13_EnhA1;E004,13_EnhA1;E005,13_EnhA1;E006,9_TxReg;E007,13_EnhA1;E008,15_EnhAF;E009,13_EnhA1;E010,13_EnhA1;E011,9_TxReg;E012,13_EnhA1;E013,9_TxReg;E014,13_EnhA1;E015,13_EnhA1;E016,13_EnhA1;E017,13_EnhA1;E018,9_TxReg;E019,13_EnhA1;E020,13_EnhA1;E021,15_EnhAF;E022,13_EnhA1;E023,13_EnhA1;E024,9_TxReg;E025,13_EnhA1;E026,13_EnhA1;E027,9_TxReg;E028,13_EnhA1;E029,9_TxReg;…	E001,H3K4me1_Enh;E002,H3K4me1_Enh;E003,H3K4me1_Enh;E004,H3K4me1_Enh;E005,H3K4me1_Enh;E006,H3K4me1_Enh;E007,H3K4me1_Enh;E008,H3K4me1_Enh;E009,H3K4me1_Enh;E010,H3K4me1_Enh;E011,H3K4me1_Enh;E012,H3K4me1_Enh;E013,H3K4me1_Enh;E014,H3K4me1_Enh;E015,H3K4me1_Enh;E016,H3K4me1_Enh;E017,H3K4me1_Enh;E018,H3K4me1_Enh;E019,H3K4me1_Enh;E020,H3K4me1_Enh;E021,H3K4me1_Enh;E022,H3K4me1_Enh;E023,H3K4me1_Enh;E024,H3K…	E004;E005;E006;E007;E017;E028;E029;E046;E050;E051;E055;E056;E091;E097;E114;E118;E121;E122;E123;E124;E125;E126;E128	HepG2,POL2,Stanford,forskolin	GTEx2015_v6,Adrenal_Gland,TGFB1,2.42898528185802e-08;Lappalainen2013,Lymphoblastoid_EUR_exonlevel,ENSG00000105323.10_41809877_41810166,4.63174577556602e-07;Westra2013,Whole_Blood,BCKDHA,3.6608219237851513E-4;Westra2013,Whole_Blood,CCDC97,4.2798113213431886E-4;Westra2013,Whole_Blood,HNRNPUL1,8.457142191445086E-16	.	.	Pou2f2_disc2;RXRA_known5;SP1_disc3	ENSG00000142039.2	CCDC97	0	0	NM_052848	CCDC97	0	0	U3	rs1056854
19	41323676	0.85	0.96	0	rs2241719	T	A	0.07	0.17	0.27	0.17	1	1	E001,7_Enh;E002,7_Enh;E003,7_Enh;E004,7_Enh;E005,7_Enh;E006,7_Enh;E009,6_EnhG;E010,7_Enh;E011,7_Enh;E012,7_Enh;E013,7_Enh;E014,7_Enh;E015,7_Enh;E016,7_Enh;E017,2_TssAFlnk;E018,7_Enh;E019,7_Enh;E020,7_Enh;E021,7_Enh;E022,7_Enh;E023,2_TssAFlnk;E024,6_EnhG;E025,7_Enh;E026,7_Enh;E029,6_EnhG;E030,7_Enh;E031,7_Enh;E032,6_EnhG;E034,6_EnhG;E035,7_Enh;E036,3_TxFlnk;E041,6_EnhG;E042,6_EnhG;E043,6_EnhG;E046…	E001,13_EnhA1;E002,15_EnhAF;E003,13_EnhA1;E004,13_EnhA1;E005,13_EnhA1;E006,13_EnhA1;E007,13_EnhA1;E008,15_EnhAF;E009,13_EnhA1;E010,13_EnhA1;E011,13_EnhA1;E012,13_EnhA1;E013,9_TxReg;E014,13_EnhA1;E015,13_EnhA1;E016,13_EnhA1;E017,13_EnhA1;E018,13_EnhA1;E019,13_EnhA1;E020,15_EnhAF;E021,15_EnhAF;E022,13_EnhA1;E023,13_EnhA1;E024,9_TxReg;E025,13_EnhA1;E026,13_EnhA1;E027,13_EnhA1;E028,13_EnhA1;E029,9_Tx…	E001,H3K4me1_Enh;E002,H3K4me1_Enh;E003,H3K4me1_Enh;E004,H3K4me1_Enh;E005,H3K4me1_Enh;E006,H3K4me1_Enh;E007,H3K4me1_Enh;E008,H3K4me1_Enh;E009,H3K4me1_Enh;E010,H3K4me1_Enh;E011,H3K4me1_Enh;E012,H3K4me1_Enh;E013,H3K4me1_Enh;E014,H3K4me1_Enh;E015,H3K4me1_Enh;E016,H3K4me1_Enh;E017,H3K4me1_Enh;E018,H3K4me1_Enh;E019,H3K4me1_Enh;E020,H3K4me1_Enh;E021,H3K4me1_Enh;E022,H3K4me1_Enh;E023,H3K4me1_Enh;E024,H3K…	E003;E004;E005;E006;E017;E021;E022;E029;E033;E034;E046;E050;E051;E055;E056;E057;E080;E081;E086;E089;E090;E091;E092;E094;E097;E098;E100;E109;E114;E118;E120;E121;E122;E123;E124;E125;E126;E127;E128	A549,GR,HudsonAlpha,DEX_100nM;A549,GR,HudsonAlpha,DEX_50nM;A549,USF1,HudsonAlpha,EtOH_0.02pct;HUVEC,CJUN,Stanford,None;HUVEC,GATA2,UCD,None;HepG2,FOSL2,HudsonAlpha,None;HepG2,FOXA1,HudsonAlpha,None;HepG2,FOXA1,HudsonAlpha,None;HepG2,FOXA2,HudsonAlpha,None;HepG2,JUND,HudsonAlpha,None;HepG2,JUND,Stanford,None;HepG2,P300,HudsonAlpha,None;K562,CCNT2,Harvard,None;K562,CFOS,Stanford,None;K562,CFOS,UChi…	GTEx2015_v6,Adrenal_Gland,TGFB1,4.3666265287694e-08;Lappalainen2013,Lymphoblastoid_EUR_exonlevel,ENSG00000105323.10_41809877_41810166,4.71895461827336e-07	.	.	EWSR1-FLI1;PRDM1_known1;TATA_disc7;p300_known1	ENSG00000142039.2	CCDC97	0	0	NM_052848	CCDC97	0	0	U3	rs1056854
19	41323701	0.84	0.96	0	rs2241718	G	A	0.07	0.17	0.27	0.18	1	1	E001,7_Enh;E002,7_Enh;E003,7_Enh;E004,7_Enh;E005,7_Enh;E006,7_Enh;E010,7_Enh;E011,7_Enh;E012,7_Enh;E013,7_Enh;E014,7_Enh;E015,7_Enh;E016,7_Enh;E017,6_EnhG;E018,7_Enh;E019,7_Enh;E020,7_Enh;E021,7_Enh;E022,7_Enh;E023,2_TssAFlnk;E024,6_EnhG;E025,7_Enh;E026,7_Enh;E029,7_Enh;E030,7_Enh;E031,7_Enh;E032,6_EnhG;E034,6_EnhG;E035,7_Enh;E036,3_TxFlnk;E041,6_EnhG;E042,6_EnhG;E043,6_EnhG;E046,6_EnhG;E049,7_En…	E001,15_EnhAF;E002,15_EnhAF;E003,15_EnhAF;E004,13_EnhA1;E005,13_EnhA1;E006,13_EnhA1;E007,15_EnhAF;E008,15_EnhAF;E009,15_EnhAF;E010,15_EnhAF;E011,13_EnhA1;E012,13_EnhA1;E013,9_TxReg;E014,13_EnhA1;E015,13_EnhA1;E016,13_EnhA1;E017,13_EnhA1;E018,13_EnhA1;E019,15_EnhAF;E020,15_EnhAF;E021,15_EnhAF;E022,14_EnhA2;E023,13_EnhA1;E024,13_EnhA1;E025,13_EnhA1;E026,13_EnhA1;E027,15_EnhAF;E028,15_EnhAF;E029,9_T…	E001,H3K4me1_Enh;E002,H3K4me1_Enh;E003,H3K4me1_Enh;E004,H3K4me1_Enh;E005,H3K4me1_Enh;E006,H3K4me1_Enh;E007,H3K4me1_Enh;E008,H3K4me1_Enh;E009,H3K4me1_Enh;E010,H3K4me1_Enh;E011,H3K4me1_Enh;E012,H3K4me1_Enh;E013,H3K4me1_Enh;E014,H3K4me1_Enh;E015,H3K4me1_Enh;E016,H3K4me1_Enh;E017,H3K4me1_Enh;E018,H3K4me1_Enh;E019,H3K4me1_Enh;E020,H3K4me1_Enh;E021,H3K4me1_Enh;E022,H3K4me1_Enh;E023,H3K4me1_Enh;E024,H3K…	E004;E005;E006;E017;E021;E022;E029;E033;E046;E050;E051;E055;E056;E057;E080;E081;E086;E090;E091;E092;E094;E097;E098;E100;E109;E114;E118;E120;E121;E122;E123;E124;E125;E126;E127;E128	A549,GR,HudsonAlpha,DEX_100nM;A549,GR,HudsonAlpha,DEX_50nM;HUVEC,CJUN,Stanford,None;HUVEC,GATA2,UCD,None;HepG2,FOSL2,HudsonAlpha,None;HepG2,FOXA1,HudsonAlpha,None;HepG2,FOXA1,HudsonAlpha,None;HepG2,FOXA2,HudsonAlpha,None;HepG2,JUND,HudsonAlpha,None;HepG2,JUND,Stanford,None;HepG2,P300,HudsonAlpha,None;K562,CCNT2,Harvard,None;K562,CFOS,Stanford,None;K562,CFOS,UChicago,None;K562,CJUN,Stanford,IFNa6h…	GTEx2015_v6,Adrenal_Gland,TGFB1,4.37241529747084e-08;Lappalainen2013,Lymphoblastoid_EUR_exonlevel,ENSG00000105323.10_41809877_41810166,5.5777852550041e-07;Westra2013,Whole_Blood,BCKDHA,3.974066678813934E-4;Westra2013,Whole_Blood,CCDC97,4.2798113213431886E-4;Westra2013,Whole_Blood,HNRNPUL1,9.5428398665223E-16	.	.	.	ENSG00000142039.2	CCDC97	0	0	NM_052848	CCDC97	0	0	U3	rs1056854
19	41324701	0.83	0.96	0	rs6957	T	C	0.28	0.22	0.34	0.18	0	0	E001,2_TssAFlnk;E002,7_Enh;E003,7_Enh;E004,7_Enh;E005,7_Enh;E006,7_Enh;E007,7_Enh;E008,7_Enh;E009,7_Enh;E010,7_Enh;E011,2_TssAFlnk;E012,7_Enh;E013,7_Enh;E014,2_TssAFlnk;E015,2_TssAFlnk;E016,2_TssAFlnk;E017,6_EnhG;E018,2_TssAFlnk;E019,2_TssAFlnk;E020,2_TssAFlnk;E021,7_Enh;E022,2_TssAFlnk;E023,7_Enh;E024,7_Enh;E025,7_Enh;E026,7_Enh;E027,7_Enh;E029,7_Enh;E030,7_Enh;E031,7_Enh;E032,7_Enh;E034,6_EnhG;…	E001,13_EnhA1;E002,15_EnhAF;E003,13_EnhA1;E004,13_EnhA1;E005,13_EnhA1;E006,13_EnhA1;E007,13_EnhA1;E008,13_EnhA1;E009,13_EnhA1;E010,13_EnhA1;E011,13_EnhA1;E012,13_EnhA1;E013,9_TxReg;E014,13_EnhA1;E015,13_EnhA1;E016,13_EnhA1;E017,9_TxReg;E018,13_EnhA1;E019,13_EnhA1;E020,13_EnhA1;E021,13_EnhA1;E022,13_EnhA1;E023,13_EnhA1;E024,13_EnhA1;E025,13_EnhA1;E026,13_EnhA1;E027,14_EnhA2;E028,15_EnhAF;E029,9_Tx…	E001,H3K4me1_Enh;E002,H3K4me1_Enh;E003,H3K4me1_Enh;E004,H3K4me1_Enh;E005,H3K4me1_Enh;E006,H3K4me1_Enh;E007,H3K4me1_Enh;E008,H3K4me1_Enh;E009,H3K4me1_Enh;E010,H3K4me1_Enh;E011,H3K4me1_Enh;E012,H3K4me1_Enh;E013,H3K4me1_Enh;E014,H3K4me1_Enh;E015,H3K4me1_Enh;E016,H3K4me1_Enh;E017,H3K4me1_Enh;E018,H3K4me1_Enh;E019,H3K4me1_Enh;E020,H3K4me1_Enh;E021,H3K4me1_Enh;E022,H3K4me1_Enh;E023,H3K4me1_Enh;E024,H3K…	E004;E006;E017;E022;E029;E033;E034;E046;E055;E056;E080;E083;E084;E090;E091;E097;E114;E122;E123	.	GTEx2015_v6,Adrenal_Gland,TGFB1,1.13328468155181e-09;GTEx2015_v6,Artery_Tibial,AXL,1.2632017687975e-07;Lappalainen2013,Lymphoblastoid_EUR_exonlevel,ENSG00000105323.10_41809877_41810166,7.20525632444646e-07	.	.	RXRA_known3	ENSG00000142039.2	CCDC97	0	0	NM_052848	CCDC97	0	0	U3	rs1056854
19	41325291	0.85	0.96	0	rs11880564	C	A	0.07	0.17	0.27	0.17	0	0	E001,1_TssA;E003,1_TssA;E004,7_Enh;E005,7_Enh;E006,7_Enh;E007,7_Enh;E008,1_TssA;E009,7_Enh;E010,7_Enh;E011,7_Enh;E012,1_TssA;E013,7_Enh;E014,1_TssA;E015,1_TssA;E016,1_TssA;E017,7_Enh;E018,1_TssA;E019,1_TssA;E020,1_TssA;E021,1_TssA;E022,2_TssAFlnk;E023,7_Enh;E024,2_TssAFlnk;E025,2_TssAFlnk;E026,7_Enh;E027,1_TssA;E028,7_Enh;E029,7_Enh;E030,7_Enh;E031,7_Enh;E032,7_Enh;E034,6_EnhG;E035,7_Enh;E036,6_E…	E001,13_EnhA1;E002,22_PromP;E003,13_EnhA1;E004,13_EnhA1;E005,13_EnhA1;E006,13_EnhA1;E007,14_EnhA2;E008,13_EnhA1;E009,13_EnhA1;E010,13_EnhA1;E011,13_EnhA1;E012,13_EnhA1;E013,9_TxReg;E014,13_EnhA1;E015,13_EnhA1;E016,13_EnhA1;E017,13_EnhA1;E018,13_EnhA1;E019,13_EnhA1;E020,13_EnhA1;E021,13_EnhA1;E022,13_EnhA1;E023,13_EnhA1;E024,13_EnhA1;E025,13_EnhA1;E026,13_EnhA1;E027,13_EnhA1;E028,14_EnhA2;E029,9_T…	E001,H3K4me1_Enh;E003,H3K4me1_Enh;E005,H3K4me1_Enh;E006,H3K4me1_Enh;E007,H3K4me1_Enh;E009,H3K4me1_Enh;E010,H3K4me1_Enh;E011,H3K4me1_Enh;E012,H3K4me1_Enh;E013,H3K4me1_Enh;E014,H3K4me1_Enh;E015,H3K4me1_Enh;E016,H3K4me1_Enh;E017,H3K4me1_Enh;E018,H3K4me1_Enh;E019,H3K4me1_Enh;E020,H3K4me1_Enh;E021,H3K4me1_Enh;E022,H3K4me1_Enh;E023,H3K4me1_Enh;E024,H3K4me1_Enh;E025,H3K4me1_Enh;E026,H3K4me1_Enh;E027,H3K…	E003;E004;E005;E006;E007;E008;E017;E021;E022;E034;E046;E050;E055;E056;E080;E081;E082;E083;E084;E086;E088;E089;E090;E091;E092;E094;E097;E098;E100;E109;E114;E118;E120;E121;E122;E123;E124;E125;E126;E128	A549,POL2,HudsonAlpha,EtOH_0.02pct;ECC-1,POL2,HudsonAlpha,DMSO_0.02pct;H1-hESC,POL24H8,HudsonAlpha,None;H1-hESC,POL24H8,HudsonAlpha,None;H1-hESC,SIN3AK20,HudsonAlpha,None;HUVEC,CFOS,UCD,None;HUVEC,CMYC,UT-A,None;HepG2,HEY1,HudsonAlpha,None;HepG2,POL2,Stanford,forskolin;HepG2,POL2,UT-A,None;HepG2,SP1,HudsonAlpha,None;K562,CCNT2,Harvard,None;K562,MAX,HudsonAlpha,None;K562,POL2,UT-A,None;MCF-7,POL2,…	GTEx2015_v6,Adrenal_Gland,TGFB1,4.11869320297173e-08;Lappalainen2013,Lymphoblastoid_EUR_exonlevel,ENSG00000105323.10_41809877_41810166,3.08428169359768e-07	.	.	Irf_disc4;Klf7;NRSF_disc4;NRSF_disc9;STAT_disc7;Zfp281	ENSG00000142039.2	CCDC97	3	410	NM_052848	CCDC97	3	407	.	rs1056854
19	41325602	0.82	0.93	0	rs12985162	G	A	0.08	0.17	0.28	0.17	0	0	E001,1_TssA;E003,1_TssA;E004,1_TssA;E005,7_Enh;E006,2_TssAFlnk;E007,7_Enh;E008,1_TssA;E009,7_Enh;E010,7_Enh;E011,7_Enh;E012,1_TssA;E013,7_Enh;E014,1_TssA;E015,1_TssA;E016,1_TssA;E017,7_Enh;E018,1_TssA;E019,1_TssA;E020,1_TssA;E021,1_TssA;E022,1_TssA;E023,7_Enh;E024,7_Enh;E025,2_TssAFlnk;E026,7_Enh;E027,1_TssA;E028,7_Enh;E029,7_Enh;E030,7_Enh;E031,7_Enh;E032,7_Enh;E034,6_EnhG;E035,7_Enh;E036,6_EnhG…	E001,13_EnhA1;E002,13_EnhA1;E003,2_PromU;E004,13_EnhA1;E005,13_EnhA1;E006,3_PromD1;E007,2_PromU;E008,13_EnhA1;E009,13_EnhA1;E010,13_EnhA1;E011,13_EnhA1;E012,13_EnhA1;E013,9_TxReg;E014,13_EnhA1;E015,13_EnhA1;E016,13_EnhA1;E017,13_EnhA1;E018,13_EnhA1;E019,13_EnhA1;E020,13_EnhA1;E021,13_EnhA1;E022,3_PromD1;E023,13_EnhA1;E024,13_EnhA1;E025,13_EnhA1;E026,13_EnhA1;E027,13_EnhA1;E028,13_EnhA1;E029,9_TxR…	E001,H3K4me1_Enh;E003,H3K4me1_Enh;E005,H3K4me1_Enh;E006,H3K4me1_Enh;E007,H3K4me1_Enh;E009,H3K4me1_Enh;E010,H3K4me1_Enh;E011,H3K4me1_Enh;E012,H3K4me1_Enh;E013,H3K4me1_Enh;E014,H3K4me1_Enh;E015,H3K4me1_Enh;E016,H3K4me1_Enh;E017,H3K4me1_Enh;E018,H3K4me1_Enh;E019,H3K4me1_Enh;E020,H3K4me1_Enh;E022,H3K4me1_Enh;E023,H3K4me1_Enh;E024,H3K4me1_Enh;E025,H3K4me1_Enh;E026,H3K4me1_Enh;E027,H3K4me1_Enh;E028,H3K…	E003;E004;E006;E017;E022;E032;E034;E046;E055;E056;E083;E088;E089;E090;E091;E092;E097;E100;E121;E122;E125;E126;E127;E128	.	GTEx2015_v6,Adrenal_Gland,TGFB1,1.18356139292046e-07;Lappalainen2013,Lymphoblastoid_EUR_exonlevel,ENSG00000105323.10_41809877_41810166,4.28649920374528e-07	.	.	Ets_disc7;GR_disc6;NF-kappaB_disc2	ENSG00000142039.2	CCDC97	3	721	NM_052848	CCDC97	3	718	.	rs1056854
19	41331710	0.85	0.96	0	rs11466359	G	A	0.07	0.17	0.26	0.17	0	0	E001,7_Enh;E004,7_Enh;E015,6_EnhG;E016,7_Enh;E018,7_Enh;E021,7_Enh;E024,7_Enh;E029,6_EnhG;E030,6_EnhG;E034,6_EnhG;E036,6_EnhG;E037,6_EnhG;E038,6_EnhG;E039,6_EnhG;E040,6_EnhG;E041,6_EnhG;E042,6_EnhG;E043,6_EnhG;E044,6_EnhG;E045,6_EnhG;E046,6_EnhG;E047,6_EnhG;E048,6_EnhG;E050,6_EnhG;E085,12_EnhBiv;E089,6_EnhG;E090,6_EnhG;E091,6_EnhG;E099,6_EnhG;E123,6_EnhG;E124,6_EnhG	E001,23_PromBiv;E004,17_EnhW2;E008,23_PromBiv;E018,23_PromBiv;E019,16_EnhW1;E022,16_EnhW1;E029,10_TxEnh5;E030,10_TxEnh5;E032,10_TxEnh5;E033,11_TxEnh3;E034,10_TxEnh5;E037,10_TxEnh5;E038,10_TxEnh5;E039,10_TxEnh5;E040,10_TxEnh5;E041,10_TxEnh5;E042,10_TxEnh5;E043,10_TxEnh5;E044,10_TxEnh5;E045,10_TxEnh5;E046,10_TxEnh5;E047,10_TxEnh5;E048,10_TxEnh5;E050,10_TxEnh5;E056,11_TxEnh3;E085,11_TxEnh3;E089,11_T…	E001,H3K4me1_Enh;E003,H3K4me1_Enh;E005,H3K4me1_Enh;E013,H3K4me1_Enh;E014,H3K4me1_Enh;E015,H3K4me1_Enh;E016,H3K4me1_Enh;E018,H3K4me1_Enh;E019,H3K4me1_Enh;E020,H3K4me1_Enh;E022,H3K4me1_Enh;E024,H3K4me1_Enh;E029,H3K4me1_Enh;E030,H3K4me1_Enh;E031,H3K4me1_Enh;E032,H3K4me1_Enh;E033,H3K4me1_Enh;E034,H3K4me1_Enh;E036,H3K4me1_Enh;E037,H3K4me1_Enh;E038,H3K4me1_Enh;E039,H3K4me1_Enh;E040,H3K4me1_Enh;E041,H3K…	E046;E097	.	GTEx2015_v6,Adrenal_Gland,TGFB1,2.57593802729956e-08;Lappalainen2013,Lymphoblastoid_EUR_exonlevel,ENSG00000105323.10_41809877_41810166,5.55813158909156e-07	.	.	BCL_disc9;BHLHE40_disc2;CHD2_disc3;DEC;E2F_disc7;Egr-1_disc1;Egr-1_disc6;Egr-1_known3;Ets_disc9;HEY1_disc2;Mxi1_known1;Myc_disc10;Myc_disc9;NRSF_disc9;Nrf1_disc3;Pou2f2_disc2;SRF_disc2;Sin3Ak-20_disc2;Sin3Ak-20_disc5;YY1_disc4;YY1_disc5;ZEB1_disc1;Znf143_disc4;p300_disc8;p300_disc9	ENSG00000105329.4	TGFB1	0	0	NM_000660	TGFB1	0	0	INT	rs1056854
19	41371586	1	1	1	rs75041078	G	A	0.06	0.33	0.45	0.22	0	0	E030,7_Enh	E030,18_EnhAc	E023,H3K4me1_Enh;E029,H3K4me1_Enh;E030,H3K4me1_Enh;E056,H3K4me1_Enh;E057,H3K4me1_Enh;E038,H3K9ac_Pro;E063,H3K9ac_Pro;E048,H3K27ac_Enh;E050,H3K27ac_Enh;E056,H3K4me3_Pro;E059,H3K4me3_Pro;E109,H3K4me3_Pro		.	GTEx2015_v6,Nerve_Tibial,B3GNT8,4.98325965864514e-06;GTEx2015_v6,Nerve_Tibial,CTC-435M10.6,1.41766858972295e-06;GTEx2015_v6,Testis,B9D2,1.6618208047765e-08;GTEx2015_v6,Testis,EXOSC5,6.7755427994807e-08;Lappalainen2013,Lymphoblastoid_EUR_exonlevel,ENSG00000105341.11_41939177_41939339,2.93391837550187e-08	.	.	Hoxa4;Pax-4_2	ENSG00000142046.9	TMEM91	0	0	NM_001098825	TMEM91	0	0	INT	rs75041078
19	41225270	0.8	0.95	0	rs4803447	A	G	0.01	0.07	0.01	0.13	0	0	E001,7_Enh;E003,7_Enh;E005,6_EnhG;E006,6_EnhG;E007,7_Enh;E013,6_EnhG;E016,7_Enh;E017,6_EnhG;E020,6_EnhG;E022,7_Enh;E023,6_EnhG;E025,6_EnhG;E026,6_EnhG;E027,3_TxFlnk;E028,7_Enh;E041,7_Enh;E042,7_Enh;E049,6_EnhG;E052,3_TxFlnk;E055,3_TxFlnk;E056,3_TxFlnk;E057,2_TssAFlnk;E058,6_EnhG;E089,7_Enh;E090,6_EnhG;E092,6_EnhG;E094,7_Enh;E095,7_Enh;E099,6_EnhG;E108,7_Enh;E111,6_EnhG;E114,3_TxFlnk;E117,7_Enh;E1…	E001,10_TxEnh5;E005,10_TxEnh5;E006,10_TxEnh5;E012,15_EnhAF;E013,9_TxReg;E015,10_TxEnh5;E016,10_TxEnh5;E017,9_TxReg;E018,17_EnhW2;E022,18_EnhAc;E023,9_TxReg;E025,9_TxReg;E026,9_TxReg;E027,9_TxReg;E028,10_TxEnh5;E041,18_EnhAc;E049,9_TxReg;E052,9_TxReg;E055,9_TxReg;E056,9_TxReg;E057,9_TxReg;E058,4_PromD2;E059,10_TxEnh5;E061,17_EnhW2;E063,10_TxEnh5;E066,15_EnhAF;E075,18_EnhAc;E076,10_TxEnh5;E077,18_E…	E001,H3K4me1_Enh;E003,H3K4me1_Enh;E004,H3K4me1_Enh;E005,H3K4me1_Enh;E006,H3K4me1_Enh;E007,H3K4me1_Enh;E009,H3K4me1_Enh;E010,H3K4me1_Enh;E011,H3K4me1_Enh;E012,H3K4me1_Enh;E013,H3K4me1_Enh;E014,H3K4me1_Enh;E015,H3K4me1_Enh;E016,H3K4me1_Enh;E017,H3K4me1_Enh;E018,H3K4me1_Enh;E019,H3K4me1_Enh;E020,H3K4me1_Enh;E021,H3K4me1_Enh;E022,H3K4me1_Enh;E023,H3K4me1_Enh;E024,H3K4me1_Enh;E025,H3K4me1_Enh;E026,H3K…		.	GTEx2015_v6,Muscle_Skeletal,TGFB1,6.27544896204558e-06;GTEx2015_v6,Thyroid,TGFB1,8.93745494604852e-06	.	.	NRSF_disc10	ENSG00000167601.6	AXL	0	0	NM_001699	AXL	0	0	INT	rs12459996
19	41226705	0.8	0.95	0	rs12459929	C	G	0.05	0.07	0.01	0.13	0	0	E001,2_TssAFlnk;E003,2_TssAFlnk;E004,2_TssAFlnk;E005,6_EnhG;E006,3_TxFlnk;E007,7_Enh;E008,2_TssAFlnk;E009,2_TssAFlnk;E010,2_TssAFlnk;E011,2_TssAFlnk;E012,7_Enh;E013,3_TxFlnk;E014,2_TssAFlnk;E015,3_TxFlnk;E016,2_TssAFlnk;E017,3_TxFlnk;E018,2_TssAFlnk;E019,11_BivFlnk;E020,2_TssAFlnk;E021,3_TxFlnk;E022,2_TssAFlnk;E023,2_TssAFlnk;E024,7_Enh;E025,3_TxFlnk;E026,3_TxFlnk;E027,3_TxFlnk;E028,7_Enh;E029,11…	E001,3_PromD1;E002,2_PromU;E003,3_PromD1;E004,2_PromU;E005,3_PromD1;E006,9_TxReg;E007,13_EnhA1;E008,3_PromD1;E009,3_PromD1;E010,3_PromD1;E011,2_PromU;E012,3_PromD1;E013,3_PromD1;E014,3_PromD1;E015,3_PromD1;E016,3_PromD1;E017,9_TxReg;E018,3_PromD1;E019,2_PromU;E020,3_PromD1;E021,2_PromU;E022,9_TxReg;E023,3_PromD1;E024,3_PromD1;E025,3_PromD1;E026,9_TxReg;E027,3_PromD1;E028,3_PromD1;E029,2_PromU;E03…	E001,H3K4me1_Enh;E003,H3K4me1_Enh;E005,H3K4me1_Enh;E006,H3K4me1_Enh;E007,H3K4me1_Enh;E009,H3K4me1_Enh;E010,H3K4me1_Enh;E011,H3K4me1_Enh;E012,H3K4me1_Enh;E013,H3K4me1_Enh;E014,H3K4me1_Enh;E015,H3K4me1_Enh;E016,H3K4me1_Enh;E017,H3K4me1_Enh;E018,H3K4me1_Enh;E019,H3K4me1_Enh;E020,H3K4me1_Enh;E021,H3K4me1_Enh;E022,H3K4me1_Enh;E023,H3K4me1_Enh;E024,H3K4me1_Enh;E025,H3K4me1_Enh;E026,H3K4me1_Enh;E027,H3K…	E003;E004;E006;E008;E017;E028;E032;E033;E034;E046;E050;E055;E056;E059;E080;E083;E084;E085;E088;E089;E090;E092;E093;E100;E109;E114;E117;E118;E119;E120;E121;E122;E123;E124;E125;E126;E127;E128	A549,GR,HudsonAlpha,DEX_50nM;A549,POL2,HudsonAlpha,EtOH_0.02pct;Gliobla,POL2,UT-A,None;HepG2,HDAC2,HudsonAlpha,None;HepG2,HEY1,HudsonAlpha,None;HepG2,SP1,HudsonAlpha,None	GTEx2015_v6,Muscle_Skeletal,TGFB1,6.11982549390102e-06	.	.	.	ENSG00000167601.6	AXL	0	0	NM_001699	AXL	0	0	INT	rs12459996
19	41226783	0.8	0.95	0	rs73043273	G	T	0.01	0.07	0.01	0.13	0	0	E001,2_TssAFlnk;E003,2_TssAFlnk;E004,2_TssAFlnk;E005,6_EnhG;E006,3_TxFlnk;E007,7_Enh;E008,2_TssAFlnk;E009,2_TssAFlnk;E010,2_TssAFlnk;E011,2_TssAFlnk;E012,7_Enh;E013,3_TxFlnk;E014,2_TssAFlnk;E015,3_TxFlnk;E016,2_TssAFlnk;E017,3_TxFlnk;E018,2_TssAFlnk;E019,11_BivFlnk;E020,2_TssAFlnk;E021,3_TxFlnk;E022,2_TssAFlnk;E023,2_TssAFlnk;E024,7_Enh;E025,3_TxFlnk;E026,3_TxFlnk;E027,3_TxFlnk;E028,7_Enh;E029,11…	E001,3_PromD1;E002,2_PromU;E003,3_PromD1;E004,2_PromU;E005,3_PromD1;E006,9_TxReg;E007,13_EnhA1;E008,3_PromD1;E009,3_PromD1;E010,3_PromD1;E011,2_PromU;E012,3_PromD1;E013,3_PromD1;E014,3_PromD1;E015,3_PromD1;E016,3_PromD1;E017,9_TxReg;E018,3_PromD1;E019,2_PromU;E020,3_PromD1;E021,2_PromU;E022,9_TxReg;E023,3_PromD1;E024,3_PromD1;E025,3_PromD1;E026,9_TxReg;E027,3_PromD1;E028,3_PromD1;E029,2_PromU;E03…	E001,H3K4me1_Enh;E003,H3K4me1_Enh;E005,H3K4me1_Enh;E006,H3K4me1_Enh;E007,H3K4me1_Enh;E009,H3K4me1_Enh;E010,H3K4me1_Enh;E011,H3K4me1_Enh;E012,H3K4me1_Enh;E013,H3K4me1_Enh;E014,H3K4me1_Enh;E015,H3K4me1_Enh;E016,H3K4me1_Enh;E017,H3K4me1_Enh;E018,H3K4me1_Enh;E019,H3K4me1_Enh;E020,H3K4me1_Enh;E021,H3K4me1_Enh;E022,H3K4me1_Enh;E023,H3K4me1_Enh;E024,H3K4me1_Enh;E025,H3K4me1_Enh;E026,H3K4me1_Enh;E027,H3K…	E003;E004;E005;E006;E007;E008;E017;E021;E032;E033;E034;E050;E051;E055;E056;E057;E059;E080;E083;E084;E086;E090;E091;E100;E109;E114;E117;E118;E121;E122;E124;E125;E126;E127;E128	.	GTEx2015_v6,Muscle_Skeletal,TGFB1,6.10272367417531e-06;GTEx2015_v6,Thyroid,TGFB1,5.70742331227098e-06	.	.	SEF-1	ENSG00000167601.6	AXL	0	0	NM_001699	AXL	0	0	INT	rs12459996
19	41227450	0.82	0.95	0	rs8109440	A	G	0.05	0.07	0.01	0.13	0	0	E006,6_EnhG;E017,6_EnhG;E025,6_EnhG;E026,6_EnhG;E035,7_Enh;E036,7_Enh;E039,7_Enh;E041,7_Enh;E042,7_Enh;E043,7_Enh;E050,7_Enh;E051,7_Enh;E055,6_EnhG;E056,6_EnhG;E057,6_EnhG;E083,7_Enh;E084,7_Enh;E085,7_Enh;E090,6_EnhG;E093,7_Enh;E111,7_Enh;E114,6_EnhG;E117,7_Enh;E118,2_TssAFlnk;E119,6_EnhG;E121,6_EnhG;E122,6_EnhG;E123,7_Enh;E126,6_EnhG;E128,6_EnhG	E017,10_TxEnh5;E023,10_TxEnh5;E025,10_TxEnh5;E026,10_TxEnh5;E027,12_TxEnhW;E033,17_EnhW2;E035,17_EnhW2;E036,17_EnhW2;E037,17_EnhW2;E038,17_EnhW2;E039,16_EnhW1;E040,17_EnhW2;E041,14_EnhA2;E042,17_EnhW2;E043,16_EnhW1;E044,16_EnhW1;E045,17_EnhW2;E047,17_EnhW2;E048,16_EnhW1;E049,10_TxEnh5;E050,17_EnhW2;E051,17_EnhW2;E052,10_TxEnh5;E055,10_TxEnh5;E056,10_TxEnh5;E062,17_EnhW2;E076,12_TxEnhW;E078,12_TxE…	E001,H3K4me1_Enh;E003,H3K4me1_Enh;E005,H3K4me1_Enh;E006,H3K4me1_Enh;E009,H3K4me1_Enh;E013,H3K4me1_Enh;E014,H3K4me1_Enh;E015,H3K4me1_Enh;E016,H3K4me1_Enh;E017,H3K4me1_Enh;E018,H3K4me1_Enh;E019,H3K4me1_Enh;E022,H3K4me1_Enh;E023,H3K4me1_Enh;E024,H3K4me1_Enh;E025,H3K4me1_Enh;E026,H3K4me1_Enh;E027,H3K4me1_Enh;E028,H3K4me1_Enh;E034,H3K4me1_Enh;E035,H3K4me1_Enh;E036,H3K4me1_Enh;E037,H3K4me1_Enh;E038,H3K…	E003;E114	.	GTEx2015_v6,Muscle_Skeletal,TGFB1,3.59382854772435e-06;GTEx2015_v6,Thyroid,TGFB1,1.59024139193683e-05	.	.	.	ENSG00000167601.6	AXL	0	0	NM_001699	AXL	0	0	INT	rs12459996
19	41244645	0.95	0.99	0	rs55841050	A	G	0.02	0.05	0.01	0.12	0	0			E013,H3K27ac_Enh;E056,H3K27ac_Enh;E129,H3K27ac_Enh;E055,H3K4me1_Enh;E055,H3K4me3_Pro;E056,H3K4me3_Pro;E110,H3K9ac_Pro		.	GTEx2015_v6,Muscle_Skeletal,TGFB1,3.48183549178062e-06;GTEx2015_v6,Thyroid,TGFB1,1.0629643299617e-07	.	.	Hoxa4;Pax-4_2;Pou2f2_known6;Pou2f2_known8;Pou3f3;Pou6f1_1;SP2_disc2	ENSG00000167601.6	AXL	0	0	NM_001699	AXL	0	0	INT	rs12459996
19	41245615	0.95	0.99	0	rs137991784	G	A	0.02	0.05	0.01	0.12	0	0			E013,H3K27ac_Enh;E056,H3K27ac_Enh;E058,H3K27ac_Enh;E129,H3K27ac_Enh;E023,H3K9ac_Pro;E063,H3K9ac_Pro;E055,H3K4me1_Enh;E056,H3K4me3_Pro		.	GTEx2015_v6,Muscle_Skeletal,TGFB1,3.69349118207405e-06;GTEx2015_v6,Thyroid,TGFB1,9.64893884532905e-08	.	.	Maf_known1;NF-E2_disc4	ENSG00000167601.6	AXL	0	0	NM_001699	AXL	0	0	INT	rs12459996
19	41249485	1	1	0	rs139833223	G	A	0.03	0.06	0.01	0.12	0	0	E006,6_EnhG		E005,H3K4me3_Pro;E055,H3K4me3_Pro;E056,H3K4me3_Pro;E096,H3K4me3_Pro;E006,H3K4me1_Enh;E022,H3K4me1_Enh;E055,H3K4me1_Enh;E056,H3K4me1_Enh;E015,H3K9ac_Pro;E023,H3K9ac_Pro;E049,H3K9ac_Pro;E111,H3K9ac_Pro;E022,H3K27ac_Enh;E049,H3K27ac_Enh;E055,H3K27ac_Enh;E056,H3K27ac_Enh;E105,H3K27ac_Enh;E111,H3K27ac_Enh;E129,H3K27ac_Enh		.	GTEx2015_v6,Muscle_Skeletal,TGFB1,5.25261138767261e-06;GTEx2015_v6,Thyroid,TGFB1,3.3066984014825e-08	.	.	CACD_2;Klf4;Klf7;NRSF_disc9;SP1_known4	ENSG00000167601.6	AXL	0	0	NM_001699	AXL	0	0	INT	rs12459996
19	41250180	1	1	0	rs17251589	T	C	0.04	0.06	0.01	0.12	0	0			E005,H3K4me3_Pro;E055,H3K4me3_Pro;E056,H3K4me3_Pro;E096,H3K4me3_Pro;E006,H3K4me1_Enh;E022,H3K4me1_Enh;E055,H3K4me1_Enh;E056,H3K4me1_Enh;E058,H3K4me1_Enh;E017,H3K27ac_Enh;E049,H3K27ac_Enh;E055,H3K27ac_Enh;E056,H3K27ac_Enh;E058,H3K27ac_Enh;E105,H3K27ac_Enh;E111,H3K27ac_Enh;E129,H3K27ac_Enh;E023,H3K9ac_Pro;E049,H3K9ac_Pro;E101,H3K9ac_Pro;E111,H3K9ac_Pro	E022;E114;E127	.	GTEx2015_v6,Muscle_Skeletal,TGFB1,5.49517040835338e-06;GTEx2015_v6,Thyroid,TGFB1,3.1747074212863e-08	.	.	HNF4_disc4;Hoxa5_1	ENSG00000167601.6	AXL	0	0	NM_001699	AXL	0	0	INT	rs12459996
19	41250658	1	1	0	rs144025261	G	T	0.03	0.06	0.01	0.12	0	0	E056,3_TxFlnk		E006,H3K4me1_Enh;E022,H3K4me1_Enh;E055,H3K4me1_Enh;E056,H3K4me1_Enh;E058,H3K4me1_Enh;E017,H3K27ac_Enh;E049,H3K27ac_Enh;E055,H3K27ac_Enh;E056,H3K27ac_Enh;E105,H3K27ac_Enh;E111,H3K27ac_Enh;E128,H3K27ac_Enh;E129,H3K27ac_Enh;E023,H3K9ac_Pro;E049,H3K9ac_Pro;E111,H3K9ac_Pro;E055,H3K4me3_Pro;E056,H3K4me3_Pro;E096,H3K4me3_Pro		.	GTEx2015_v6,Muscle_Skeletal,TGFB1,5.55440397448374e-06;GTEx2015_v6,Thyroid,TGFB1,3.09306765656771e-08	.	.	GR_disc1;GR_known7;GR_known9	ENSG00000167601.6	AXL	0	0	NM_001699	AXL	0	0	INT	rs12459996
19	41251001	1	1	1	rs12459996	G	T	0.04	0.06	0.01	0.12	0	0	E056,3_TxFlnk		E007,H3K4me3_Pro;E055,H3K4me3_Pro;E056,H3K4me3_Pro;E059,H3K4me3_Pro;E096,H3K4me3_Pro;E017,H3K27ac_Enh;E049,H3K27ac_Enh;E055,H3K27ac_Enh;E056,H3K27ac_Enh;E105,H3K27ac_Enh;E111,H3K27ac_Enh;E128,H3K27ac_Enh;E129,H3K27ac_Enh;E017,H3K9ac_Pro;E023,H3K9ac_Pro;E049,H3K9ac_Pro;E111,H3K9ac_Pro;E056,H3K4me1_Enh;E058,H3K4me1_Enh;E089,H3K4me1_Enh;E113,H3K4me1_Enh		.	GTEx2015_v6,Muscle_Skeletal,TGFB1,5.59976124763e-06;GTEx2015_v6,Thyroid,TGFB1,3.04319608668716e-08;Westra2013,Whole_Blood,HNRNPUL1,3.862399794711911E-16	.	19222302,Differential exon level expression of AXL [probe 3834080] in brain cortex,5.57E-05;21829388,Gene expression of HNRNPUL1 in blood,1.9E-05	Ik-1_2;Myf_1;STAT_known11;STAT_known12;STAT_known14;STAT_known15;STAT_known4;STAT_known7;STAT_known9	ENSG00000167601.6	AXL	0	0	NM_001699	AXL	0	0	INT	rs12459996
19	41251802	1	1	0	rs55994820	A	G	0.01	0.06	0.01	0.12	0	0			E006,H3K4me1_Enh;E089,H3K4me1_Enh;E017,H3K9ac_Pro;E023,H3K9ac_Pro;E049,H3K9ac_Pro;E026,H3K27ac_Enh;E049,H3K27ac_Enh;E056,H3K27ac_Enh;E111,H3K27ac_Enh;E128,H3K27ac_Enh;E129,H3K27ac_Enh;E059,H3K4me3_Pro		.	GTEx2015_v6,Muscle_Skeletal,TGFB1,5.59976124763e-06;GTEx2015_v6,Thyroid,TGFB1,2.67191185105657e-09	.	.	Ascl2;BCL_disc5;Evi-1_2;Myf_2;Obox3	ENSG00000167601.6	AXL	0	0	NM_001699	AXL	0	0	INT	rs12459996
19	41253569	1	1	0	rs73045223	C	T	0.02	0.06	0.01	0.12	0	0	E055,6_EnhG	E055,10_TxEnh5;E056,10_TxEnh5	E006,H3K27ac_Enh;E008,H3K27ac_Enh;E017,H3K27ac_Enh;E022,H3K27ac_Enh;E049,H3K27ac_Enh;E055,H3K27ac_Enh;E056,H3K27ac_Enh;E059,H3K27ac_Enh;E074,H3K27ac_Enh;E076,H3K27ac_Enh;E096,H3K27ac_Enh;E104,H3K27ac_Enh;E105,H3K27ac_Enh;E111,H3K27ac_Enh;E126,H3K27ac_Enh;E128,H3K27ac_Enh;E129,H3K27ac_Enh;E006,H3K4me1_Enh;E055,H3K4me1_Enh;E056,H3K4me1_Enh;E089,H3K4me1_Enh;E105,H3K4me1_Enh;E113,H3K4me1_Enh;E023,H3K…	E114	.	GTEx2015_v6,Muscle_Skeletal,TGFB1,5.59976124763e-06;GTEx2015_v6,Thyroid,TGFB1,2.67191185105657e-09	.	.	HNF4_known4;HNF4_known5;NRSF_disc4;RAR;RXRA_known3;RXRA_known4;RXRA_known6;Znf143_disc3	ENSG00000167601.6	AXL	0	0	NM_001699	AXL	0	0	INT	rs12459996
19	41255008	1	1	0	rs73045226	A	G	0.01	0.06	0.01	0.12	0	0			E006,H3K27ac_Enh;E012,H3K27ac_Enh;E049,H3K27ac_Enh;E055,H3K27ac_Enh;E056,H3K27ac_Enh;E061,H3K27ac_Enh;E068,H3K27ac_Enh;E076,H3K27ac_Enh;E111,H3K27ac_Enh;E128,H3K27ac_Enh;E027,H3K9ac_Pro;E049,H3K9ac_Pro;E124,H3K9ac_Pro;E055,H3K4me1_Enh;E055,H3K4me3_Pro;E056,H3K4me3_Pro;E059,H3K4me3_Pro		.	GTEx2015_v6,Muscle_Skeletal,TGFB1,5.59976124763e-06;GTEx2015_v6,Thyroid,TGFB1,2.67191185105657e-09	.	.	AIRE_1;AIRE_2;CTCF_disc1;CTCF_disc3;CTCF_disc6;CTCF_disc8;CTCF_known1;Rad21_disc1;Rad21_disc2;Rad21_disc4;SMC3_disc1	ENSG00000167601.6	AXL	0	0	NM_001699	AXL	0	0	INT	rs12459996
19	41258663	1	1	0	rs12461203	G	T	0.01	0.06	0.01	0.12	0	0			E006,H3K27ac_Enh;E049,H3K27ac_Enh;E055,H3K27ac_Enh;E056,H3K27ac_Enh;E059,H3K27ac_Enh;E061,H3K27ac_Enh;E068,H3K27ac_Enh;E096,H3K27ac_Enh;E128,H3K27ac_Enh;E129,H3K27ac_Enh;E023,H3K9ac_Pro;E025,H3K9ac_Pro;E049,H3K9ac_Pro;E063,H3K9ac_Pro;E101,H3K9ac_Pro;E125,H3K9ac_Pro;E055,H3K4me1_Enh;E096,H3K4me1_Enh;E055,H3K4me3_Pro;E056,H3K4me3_Pro;E070,H3K4me3_Pro		.	GTEx2015_v6,Muscle_Skeletal,TGFB1,5.45866191731405e-06;GTEx2015_v6,Thyroid,TGFB1,2.67191185105657e-09	.	.	SETDB1_disc1;Znf143_disc3;Znf143_known1	ENSG00000167601.6	AXL	0	0	NM_001699	AXL	0	0	INT	rs12459996
19	41261073	1	1	0	rs73045231	G	C	0.01	0.06	0.01	0.12	1	0			E006,H3K27ac_Enh;E026,H3K27ac_Enh;E032,H3K27ac_Enh;E034,H3K27ac_Enh;E037,H3K27ac_Enh;E039,H3K27ac_Enh;E040,H3K27ac_Enh;E041,H3K27ac_Enh;E043,H3K27ac_Enh;E044,H3K27ac_Enh;E046,H3K27ac_Enh;E047,H3K27ac_Enh;E049,H3K27ac_Enh;E055,H3K27ac_Enh;E059,H3K27ac_Enh;E062,H3K27ac_Enh;E063,H3K27ac_Enh;E067,H3K27ac_Enh;E068,H3K27ac_Enh;E069,H3K27ac_Enh;E071,H3K27ac_Enh;E072,H3K27ac_Enh;E074,H3K27ac_Enh;E076,H3K…	E114	.	GTEx2015_v6,Muscle_Skeletal,TGFB1,4.86003003797636e-06;GTEx2015_v6,Thyroid,TGFB1,2.67191185105657e-09	.	.	HNF4_known2;HNF4_known3;YY1_known6	ENSG00000167601.6	AXL	0	0	NM_001699	AXL	0	0	U3	rs12459996
